**Long title: Human demographic history has amplified the effects of background selection across the genome**

**Short title: Background selection and demography in humans**

Raul Torres<sup>1</sup>, Zachary A. Szpiech<sup>2</sup>, and Ryan D. Hernandez<sup>2,3,4,5\*</sup>

<sup>1</sup> Biomedical Sciences Graduate Program, University of California San Francisco, San Francisco, CA, United States of America

<sup>2</sup> Department of Bioengineering and Therapeutic Sciences, University of California San Francisco, San Francisco, CA, United States of America

<sup>3</sup> Institute for Human Genetics, University of California San Francisco, San Francisco, CA, United States of America

<sup>4</sup> Institute for Computational Health Sciences, University of California San Francisco, San Francisco, CA, United States of America

<sup>5</sup> Quantitative Biosciences Institute, University of California San Francisco, San Francisco, CA, United States of America

\* Corresponding author

E-mail: [ryan.hernandez@ucsf.edu](mailto:ryan.hernandez@ucsf.edu) (RDH)

## 1 **Abstract**

2           Natural populations often grow, shrink, and migrate over time. Demographic pro-  
3 cesses such as these can impact genome-wide levels of genetic diversity. In addition,  
4 genetic variation in functional regions of the genome can be altered by natural selection,  
5 which drives adaptive mutations to higher frequencies or purges deleterious ones. Such  
6 selective processes impact not only the sites directly under selection but also nearby  
7 neutral variation through genetic linkage through processes referred to as genetic hitch-  
8 hiking in the context of positive selection and background selection (BGS) in the context  
9 of purifying selection. While there is extensive literature examining the impact of selec-  
10 tion at linked sites at demographic equilibrium, less is known about how non-equilibrium  
11 demographic processes impact the effects of hitchhiking and BGS. Utilizing a global  
12 sample of human whole-genome sequences from the Thousand Genomes Project and  
13 extensive simulations, we investigate how non-equilibrium demographic processes  
14 magnify and dampen the consequences of selection at linked sites across the human  
15 genome. When binning the genome by inferred strength of BGS, we observe that, com-  
16 pared to Africans, non-African populations have experienced larger proportional de-  
17 creases in neutral genetic diversity in such regions. We replicate these findings in ad-  
18 mixed populations by showing that non-African ancestral components of the genome  
19 have also been impacted more severely in these regions. We attribute these differences  
20 to the strong, sustained/recurrent population bottlenecks that non-Africans experienced  
21 as they migrated out of Africa and throughout the globe. Furthermore, we observe a  
22 strong correlation between  $F_{ST}$  and inferred strength of BGS, suggesting a stronger rate  
23 of genetic drift. Forward simulations of human demographic history with a model of BGS

24 support these observations. Our results show that non-equilibrium demography signifi-  
25 cantly alters the consequences selection at linked sites and support the need for more  
26 work investigating the dynamic process of multiple evolutionary forces operating in con-  
27 cert.

28

## 29 **Author summary**

30 Patterns of genetic diversity within a species are affected at broad and fine  
31 scales by population size changes (“demography”) and natural selection. From both  
32 population genetics theory and observation of genomic sequence data, it is known that  
33 demography can alter genome-wide average neutral genetic diversity. Additionally, nat-  
34 ural selection can affect neutral genetic diversity regionally across the genome via se-  
35 lection at linked sites. During this process, natural selection acting on adaptive or dele-  
36 terious variants in the genome will also impact diversity at nearby neutral sites due to  
37 genetic linkage. However, less is well known about the dynamic changes to diversity  
38 that occur in regions impacted by selection at linked sites when a population undergoes  
39 a size change. We characterize these dynamic changes using thousands of human ge-  
40 nomes and find that the population size changes experienced by humans have shaped  
41 the consequences of linked selection across the genome. In particular, population con-  
42 tractions, such as those experienced by non-Africans, have disproportionately de-  
43 creased neutral diversity in regions of the genome inferred to be under strong back-  
44 ground selection (i.e., selection at linked sites that is caused by natural selection acting  
45 on deleterious variants), resulting in large differences between African and non-African  
46 populations.

47

## 48 **Introduction**

49           Genetic diversity in a species is determined through the complex interplay of mu-  
50 tation, demography, genetic drift, and natural selection. These evolutionary forces oper-  
51 ate in concert to shape patterns of diversity at both the local scale and genome-wide  
52 scale. For example, in recombining species, levels of genetic diversity are distributed  
53 heterogeneously across the genome as peaks and valleys that are often correlated with  
54 recombination rate and generated by past or ongoing events of natural selection [1].  
55 But at the genome-wide scale, average levels of genetic diversity are primarily impacted  
56 by population size changes, yielding patterns of diversity that are a function of a popula-  
57 tion's demographic history [2]. These patterns of diversity may also yield information for  
58 inferring past events of natural selection and population history, giving valuable insight  
59 into how populations have evolved over time [3–8]. With recent advances in sequencing  
60 technology yielding whole-genome data from thousands of individuals from species with  
61 complex evolutionary histories [9,10], formal inquiry into the interplay of demography  
62 and natural selection and testing whether demographic effects act uniformly across the  
63 genome as a function of natural selection is now possible.

64           In the past decade, population genetic studies have shed light on the pervasive-  
65 ness of dynamic population histories in shaping overall levels of genetic diversity across  
66 different biological species. For example, multiple populations have experienced major  
67 population bottlenecks and founder events that have resulted in decreased levels of ge-  
68 nome-wide diversity. Evidence for population bottlenecks exists in domesticated species  
69 such as cattle [11], dogs [12], and rice [13], and in natural populations such as *Drosoph-*

70 *ila melanogaster* [14–16], rhesus macaque [17], and humans [18,19]. Notably, popula-  
71 tion bottlenecks leave long lasting signatures of decreased diversity, which may be de-  
72 pressed even after a population has recovered to or surpassed its ancestral size  
73 [20,21]. Such examples are evident in humans, where non-African populations exhibit a  
74 lower amount of genetic diversity compared to Africans [9], despite the fact that they  
75 have been inferred to have undergone a greater population expansion in recent times  
76 [22,23].

77         Locally (i.e., regionally) across the genome, the action of natural selection can  
78 also lead to distinct signatures of decreased genetic diversity (although some forms of  
79 selection, such as balancing selection, can increase genetic diversity [24]). For exam-  
80 ple, mutations with functional effects may be removed from the population due to purify-  
81 ing selection or fix due to positive selection, thereby resulting in the elimination of genet-  
82 ic diversity at the site. But while sites under direct natural selection in the genome rep-  
83 resent only a small fraction of all sites genome-wide, the action of natural selection on  
84 these selected sites can have far-reaching effects across neutral sites in the genome  
85 due to linkage. Under positive selection, genetic hitchhiking [25] causes variants lying  
86 on the same haplotype as the selected allele to rise to high frequency during the selec-  
87 tion process (note that we will use the term “genetic hitchhiking” here only in the positive  
88 selection context of selection at linked sites). Conversely, under purifying selection,  
89 background selection (BGS) [26] causes linked neutral variants to decrease in frequen-  
90 cy or be removed from the population. Both of these processes of selection at linked  
91 sites result in decreased neutral genetic diversity around the selected site. Recombina-  
92 tion can decouple neutral sites from selected sites in both cases and neutral diversity

93 tends to increase toward its neutral expectation as genetic distance from selected sites  
94 increases [27].

95 Evidence for genetic hitchhiking and BGS has been obtained from the genomes  
96 of several species, including *Drosophila melanogaster* [28–33], wild and domesticated  
97 rice [34,35], nematodes [36,37], humans [3,6,38–42], and others (see [1] for a review).  
98 While the relative contributions of genetic hitchhiking and BGS to shaping patterns of  
99 human genomic diversity have been actively debated [40,43–45], the data strongly sup-  
100 port a large role for BGS in shaping genome-wide patterns of neutral genetic variation  
101 [41,42]. Indeed, recent arguments have been made in favor of BGS being treated as the  
102 null model when investigating the impact of selection at linked sites across recombining  
103 genomes [1,32,45–48], with one study in humans showing that BGS has decreased ge-  
104 netic diversity by 19-26% if other modes of selection at linked sites are assumed to be  
105 minor [6].

106 Although the effects of selection at linked sites across the genome have been  
107 described in a multitude of studies, it is still less obvious whether populations that have  
108 experienced different demographic histories, such as African and non-African human  
109 populations, should exhibit similar relative effects in those regions. In the context of  
110 BGS, early work resulted in the expression  $\pi \approx 4f_0N_e\mu$  [26], which suggests that the ex-  
111 pected level of diversity with BGS is simply proportional to the neutral expectation (with  
112 proportionality constant  $f_0$  being a function of the rates of deleterious mutation and re-  
113 combination). Importantly, while populations with different  $N_e$  are expected to have dif-  
114 ferent levels of  $\pi$  in the context of BGS, the proportionality constant  $f_0$  is assumed to be  
115 independent of population history (so long as the recombination landscape and delete-

116 rious mutation rates remain constant). Much of the theory developed in the context of  
117 BGS has been developed under the assumption that the population is at demographic  
118 equilibrium, and recent work has demonstrated that this assumption likely holds under  
119 changing demography if selection is strong enough (or populations are large enough)  
120 such that mutation-selection balance is maintained [49,50]. However, strong, sustained  
121 population bottlenecks may lead to violations of that assumption. Thus, in humans and  
122 other natural populations experiencing non-equilibrium demography, genetic drift may  
123 perturb genetic diversity at neutral sites under BGS that are unaccounted for in these  
124 models.

125         While little attention has been given to the potential consequences of demogra-  
126 phy on patterns of neutral variation in regions experiencing selection at linked sites (but  
127 see [51,52] for how selection at linked sites may impact the inference of demography  
128 itself), recent studies have suggested that alleles directly under natural selection experi-  
129 ence non-linear dynamics in the context of non-equilibrium demography. For the case of  
130 purifying selection, the equilibrium frequency of an allele is dependent on its fitness ef-  
131 fect, with deleterious alleles having lower equilibrium frequencies than neutral alleles.  
132 After a population size change, deleterious alleles tend to change frequency faster than  
133 neutral alleles, allowing them to reach their new equilibrium frequency at a faster rate  
134 [53,54]. This can result in relative differences in deleterious allele frequencies among  
135 populations with different demographic histories. Such effects are especially apparent in  
136 populations suffering bottlenecks [55] and have been tested and observed between dif-  
137 ferent human populations with founder populations exhibiting a greater proportion of  
138 non-synonymous variation relative to synonymous variation [56–58]. We hypothesized

139 that these non-equilibrium dynamics could also perturb nearby neutral variants due to  
140 the effects of selection at linked sites. In support of our hypothesis, a recent simulation  
141 study modeling *Drosophila* observed that population bottlenecks can result in different  
142 rates of recovery of neutral genetic diversity depending on the strength of BGS [48].  
143 Another recent study [59] analyzed neutral diversity surrounding putatively deleterious  
144 loci in domesticated versus wild maize. They found that the extreme domestication bot-  
145 tleneck reduced the efficiency of purifying selection, which has resulted in higher rela-  
146 tive diversity in the domesticated population compared to the wild population (which has  
147 likely experienced a much more stable demographic history). Together, these studies  
148 provide further evidence that non-equilibrium demography should have a strong effect  
149 on patterns of diversity in the presence of selection at linked sites.

150 To investigate the impact of non-equilibrium dynamics in regions experiencing  
151 selection at linked sites, we measure patterns of average pairwise neutral genetic diver-  
152 sity ( $\pi$ ), or neutral heterozygosity if the population was admixed, as a function of the  
153 strength of BGS,  $B$  (inferred by Ref. [6]), within a global set of human populations from  
154 phase 3 of the Thousand Genomes Project (TGP) [9]. We focus on the ratio of neutral  
155 diversity in regions of strong BGS (low  $B$ ) to regions of weak BGS (high  $B$ , the closest  
156 proxy available for neutral variation in humans), which we term “relative diversity.” While  
157 there are many caveats that may plague the direct interpretation of specific  $B$  values  
158 (e.g., positive selection is not modeled, the distribution of fitness effects are inconsistent  
159 with other studies, and the deleterious mutation rate exceeds the per base pair mutation  
160 rate of other studies), we argue below that  $B$  scores nevertheless provide a decent



161 proxy for ranking sites from most closely linked to deleterious loci (low  $B$ ) to most un-  
162 linked from deleterious loci (high  $B$ ) in humans.

163 We find substantial differences in relative diversity between populations, which  
164 we attribute to their non-equilibrium demographics. We confirm that the interplay of de-  
165 mography and selection at linked sites can explain the differences of relative diversity  
166 across human populations with simulations incorporating a parametric demographic  
167 model of human history [7] with and without a model of BGS. We also investigate how  
168 genetic differentiation between TGP populations (as measured by  $F_{ST}$ ) is shaped by se-  
169 lection at linked sites by measuring  $F_{ST}$  as a function of  $B$ . Finally, we demonstrate that  
170 back migration from Europeans and Asians into Africa re-introduces sufficient deleteri-  
171 ous variation to impact patterns of BGS, leading to decreased relative diversity in Afri-  
172 cans. Our results demonstrate the strong impact that changing demography has on per-  
173 turbing levels of diversity in regions experiencing selection at linked sites and have im-  
174 plications for population genetic studies seeking to characterize linked selection across  
175 any species or population that is not at demographic equilibrium.

176

## 177 **Results**

### 178 **Differential impact of selection at linked sites across human populations**

179 We measured mean pairwise genetic diversity ( $\pi$ ) in the autosomes (we ignore  
180 the sex chromosomes and the mitochondrial genome for all analyses) among the 20  
181 non-admixed populations from the phase 3 TGP data set, consisting of 5 populations  
182 each from 4 continental groups: Africa (AFR), Europe (EUR), South Asia (SASN), and  
183 East Asia (EASN; population labels and groupings reported in S12 Table in Supporting

184 information). A set of stringent filters, including the masking of sites inferred to be under  
185 selective sweeps, were first applied to all 20 populations to identify a high-quality set of  
186 putatively neutral sites in the genome (see Materials and Methods). Sites were then di-  
187 vided into quantile bins based on  $B$  [6]. For our initial set of analyses, we focused on the  
188 bins corresponding to the 1% of sites inferred to be under the strongest amount of BGS  
189 (i.e., sites having the lowest inferred  $B$  values) and the 1% of sites inferred to be under  
190 the weakest amount BGS (i.e., sites having the highest inferred  $B$  values). Mean diversi-  
191 ty was normalized by divergence with rhesus macaque within these bins for each popu-  
192 lation and is shown in Figs 1A-B. As expected, normalized diversity was highest in Afri-  
193 can populations and lowest in East Asian populations across both 1%  $B$  quantile bins.

194 To estimate the impact that selection at linked sites has had on neutral diversity,  
195 we calculated a statistic called “relative diversity” (analogous to  $\pi/\pi_0$  in the BGS litera-  
196 ture; [26,60]) for each population. We define relative diversity as the ratio of normalized  
197 diversity in the lowest 1%  $B$  bin to normalized diversity in the highest 1%  $B$  bin, which  
198 should capture the relative impact of selection at linked sites within the genome. Fig 1C  
199 shows that relative diversity was lower in non-African populations (0.348-0.365 for non-  
200 Africans, 0.396-0.408 for Africans), suggesting that these populations have experienced  
201 a greater reduction in diversity due to selection at linked sites than can be explained by  
202 demography alone.

203 To characterize these effects across a broader distribution of sites experiencing  
204 selection at linked sites, we grouped populations together according to their continental  
205 group (i.e., African, European, South Asian, and East Asian, see S12 Table in Support-  
206 ing information for a detailed description) and estimated relative diversity at neutral sites

207 for each of the continental groups in bins corresponding to the lowest 1%, 5%, 10%,  
208 and 25% quantiles of  $B$  (note these partitions were not disjoint). As expected, relative  
209 diversity increased for all continental groups as the bins became more inclusive (Fig  
210 2B), reflecting a reduced impact on the reduction of diversity due to selection at linked  
211 sites. We also observed that non-African continental groups consistently had a lower  
212 relative diversity compared to African groups, demonstrating that the patterns we ob-  
213 served in the most extreme regions experiencing selection at linked sites also held for  
214 broader regions. Interestingly, we observed a consistent trend of rank order for relative  
215 diversity between the different continental groups for each quantile bin, with the East  
216 Asian group experiencing the greatest reduction of relative diversity, followed by the  
217 South Asian, European, and African groups. This result suggested a stronger effect for  
218 demography on the diversity-reducing effect selection at linked sites for those popula-  
219 tions experiencing the strongest bottlenecks. However, the observed differences in rela-  
220 tive diversity between non-African and African continental groups became less pro-  
221 nounced as the bins became more inclusive (Fig 2B). These effects remained even af-  
222 ter we controlled for the effects of GC-biased gene conversion and recombination  
223 hotspots (S2 and S4 Figs) or if we did not normalize diversity by divergence (S3 and S5  
224 Figs). Patterns of relative diversity in regions of local ancestry (i.e., African, European,  
225 or Native American) across admixed TGP populations also largely recapitulated the pat-  
226 terns observed in their continental group counterparts across  $B$  quantile bins, with the  
227 largest reductions in relative diversity occurring for the Native American and European  
228 ancestral segments (S11 Fig, S1 Supporting information).

229 To test if demography has impacted selection at linked sites more recently in  
230 time, we also calculated the number of singletons observed per site (normalizing by di-  
231 vergence and using the same set of neutral filters as was used for the calculations of  $\pi$ )  
232 across the lowest and highest 1%  $B$  quantile bins. Singletons are, on average, the  
233 youngest variants within the genome and should better capture signals about more re-  
234 cent population history. We took the ratio of singletons observed per-site across these  
235 extreme  $B$  quantile bins to create a statistic called relative singleton density, which we  
236 term “ $\psi/\psi_0$ .” We accounted for differences in population sample size by first projecting  
237 down all populations to  $2N=170$  (Materials and methods). Qualitatively, our measure-  
238 ments of  $\psi/\psi_0$  showed patterns in the opposite direction of our calculations of  $\pi/\pi_0$ , with  
239 Africans exhibiting a lower ratio of  $\psi/\psi_0$  when compared to non-Africans (0.665-0.695  
240 for Africans, 0.733-0.804 for non-Africans; Fig 3). These patterns suggest that the im-  
241 pact of demography on regions experiencing selection at linked sites is transient, with  
242 patterns of relative diversity between populations dependent on the time frame in which  
243 they are captured (see Discussion).

244

### 245 **Selection at linked sites has shaped patterns of population differentiation**

246 We have shown that selection at linked sites increases the rate of drift at neutral  
247 loci, and that this process is amplified by demographic changes like population bottle-  
248 necks. One might then expect that selection could also amplify population differentiation  
249 at linked neutral loci. This outcome is obvious in the context of hitchhiking (where linked  
250 neutral loci sweep to high frequency) but is also expected with BGS [61,62], since de-  
251 creases in diversity can accelerate differentiation. Here we quantify the magnitude of

252 the effect of BGS on population differentiation in humans, and find that population dif-  
 253 ferentiation at neutral loci is indeed highly correlated with  $B$  (the inferred strength of  
 254 BGS; Fig 4 and Table 1). Specifically, we divided the genome into 2% quantile bins  
 255 based on the genome-wide distribution of  $B$  and measured  $F_{ST}$  in each bin for all pairs  
 256 of populations from different continental groups [63]. We then performed simple linear  
 257 regression using  $B$  as an explanatory variable and  $F_{ST}$  as our dependent variable with  
 258 the linear model  $F_{ST} = \beta_0 + \beta_1 B + \varepsilon$ . We found that across all 150 population compari-  
 259 sons (i.e., the “Global” estimate in Table 1),  $B$  explained 26.9% of the change in  $F_{ST}$   
 260 across the most extreme  $B$  values, was robust to outliers [64] (S6 Table in Supporting  
 261 information), and dominated the effects of local recombination rate (see Supporting in-  
 262 formation).

263 **Table 1. Regression coefficient estimates for linear regression of  $F_{ST}$  on 2% quan-**  
 264 **tile bins of  $B$ .**

|           | AFR vs.<br>EASN | AFR vs.<br>EUR | AFR vs.<br>SASN | EUR vs.<br>SASN | EUR vs.<br>EASN | SASN vs.<br>EASN | Global       |
|-----------|-----------------|----------------|-----------------|-----------------|-----------------|------------------|--------------|
| $\beta_0$ | 0.2044          | 0.1716         | 0.1596          | 0.0455          | 0.1216          | 0.0903           | 0.1322       |
| $\pm$ SEM | $\pm$ 0.0039    | $\pm$ 0.0031   | $\pm$ 0.0029    | $\pm$ 0.0011    | $\pm$ 0.0029    | $\pm$ 0.0023     | $\pm$ 0.0019 |
| ( $p$ )   | (< 1e-04)       | (< 1e-04)      | (< 1e-04)       | (< 1e-04)       | (< 1e-04)       | (< 1e-04)        | (< 1e-04)    |
| $\beta_1$ | -0.0434         | -0.0358        | -0.0355         | -0.0098         | -0.0173         | -0.0261          | -0.0280      |
| $\pm$ SEM | $\pm$ 0.0046    | $\pm$ 0.0037   | $\pm$ 0.0034    | $\pm$ 0.0013    | $\pm$ 0.0035    | $\pm$ 0.0027     | $\pm$ 0.0022 |
| ( $p$ )   | (< 1e-04)       | (< 1e-04)      | (< 1e-04)       | (< 1e-04)       | (< 1e-04)       | (< 1e-04)        | (< 1e-04)    |
| $r$       | -0.8363         | -0.7441        | -0.7794         | -0.3847         | -0.6220         | -0.5968          | -0.1292      |
| $\pm$ SEM | $\pm$ 0.0295    | $\pm$ 0.0362   | $\pm$ 0.0332    | $\pm$ 0.0414    | $\pm$ 0.0785    | $\pm$ 0.0348     | $\pm$ 0.0098 |

265  
 266 The first two rows give the regression coefficients for the linear model  $F_{ST} = \beta_0 + \beta_1 B +$   
 267  $\varepsilon$ , where  $B$  represents the mean background selection coefficient for the bin being test-  
 268 ed and  $F_{ST}$  is the estimated  $F_{ST}$  for all population comparisons within a particular pair of  
 269 continental groups (given in the column header). The final column, “Global”, gives the  
 270 regression coefficients for the linear model applied to all pairwise population compari-  
 271 sons (150 total). The correlation coefficient,  $r$ , between  $B$  and  $F_{ST}$  for each comparison  
 272 is shown in the bottom row. Standard errors of the mean (SEM) for  $\beta_0$ ,  $\beta_1$ , and  $r$  were  
 273 calculated from 1,000 bootstrap iterations (see Materials and Methods). P-values are  
 274 derived from a two-sided t-test of the t-value for the corresponding regression coeffi-  
 275 cient.  
 276

277

## 278 **Demographic inference in putatively neutral regions of the genome**

279         One consequence of BGS and hitchhiking in driving patterns of neutral variation  
280 within and between human populations is that demographic inference could be substan-  
281 tially biased [51,52,65]. To assess the degree of bias in the context of human data, we  
282 fit a 13-parameter demographic model of African, European, and East Asian demogra-  
283 phy using only putatively neutral regions of the genome under the weakest effects of  
284 selection at linked sites ( $B \geq 0.994$ ) from a subset of TGP individuals with high coverage  
285 whole genome sequence data (see Materials and Methods). Our demographic model  
286 followed that of Gutenkunst et al. [7], with an ancient human expansion in Africa and a  
287 single out-of-Africa bottleneck followed by European- and East Asian-specific bottle-  
288 necks, as well as exponential growth in both non-African populations and migration be-  
289 tween all populations. To make comparisons to previous studies that have used se-  
290 quence data from coding regions or genes [7,22,23], which may be under strong BGS  
291 or hitchhiking effects, we also inferred demographic parameters using coding four-fold  
292 degenerate synonymous sites. Our inferred parameters for human demography were  
293 strikingly different between the two sets of sequence data (S1 Fig, S1 Table in Support-  
294 ing information). Notably, inferred effective population size parameters were larger for  
295 contemporary population sizes when using four-fold degenerate synonymous sites ver-  
296 sus ascertained neutral regions with  $B \geq 0.994$ , with  $N_e$  inferred to be 22%, 23%, and  
297 29% larger for AFR, EUR, and EASN populations, respectively. This is despite the fact  
298 that the ancestral  $N_e$  was inferred to be lower for four-fold degenerate synonymous sites  
299 ( $N_e = 18,449$  and  $17,118$ , for neutral regions with  $B \geq 0.994$  and four-fold degenerate

300 sites, respectively). This result may stem from the expected decrease in  $N_e$  going into  
301 the past in regions of strong BGS, which can lead to inflated estimates of recent popula-  
302 tion growth [52] and has also been shown in simulation studies of synonymous sites  
303 under BGS [65]. Put more simply, the skew of the site-frequency spectrum towards rare  
304 variants in regions experiencing selection at linked sites mimics a population expansion,  
305 thus leading to erroneous inference.

306

### 307 **Simulations confirm that demographic effects can impact background selection**

308 Using the demographic parameters inferred from neutral regions where  $B \geq$   
309 0.994, we simulated patterns of neutral diversity with and without the effects BGS (see  
310 Materials and Methods). To measure the relative impact of BGS for each population, we  
311 then took the ratio of neutral diversity from BGS simulations ( $\pi$ ) and neutral diversity  
312 from simulations without BGS ( $\pi_0$ ) to calculate relative diversity ( $\pi/\pi_0$ ). As expected, we  
313 found that BGS reduced relative diversity ( $\pi/\pi_0 < 1$ ) for all three populations in our simu-  
314 lations. However, non-African populations experienced a proportionally larger decrease  
315 in  $\pi/\pi_0$  compared to the African population ( $\pi/\pi_0 = 0.43, 0.42, 0.41$  in AFR, EUR, and  
316 EASN respectively). These results are comparable to (but not quite as extreme as) the  
317 effects we observed in the regions of the genome with the strongest effects of BGS for  
318 these population groups (Fig 1C). To understand how this dynamic process occurs, we  
319 sampled all simulated populations every 100 generations through time to observe the  
320 effect of population size change on  $\pi$ ,  $\pi_0$ , and the ratio  $\pi/\pi_0$  (Fig 5). We observed that  
321 there is a distinct drop in  $\pi$  and  $\pi_0$  at each population bottleneck experienced by non-  
322 Africans, with East Asians (who had a more severe bottleneck) experiencing a larger

323 drop than Europeans. Fig 5C shows that the population bottlenecks experienced by  
324 non-African populations also reduces  $\pi/\pi_0$ . Surprisingly, Africans also experienced a  
325 large drop in  $\pi/\pi_0$  (but less than non-Africans) even though they did not experience any  
326 bottlenecks. This was attributable to migration between non-Africans and Africans and  
327 this pattern disappeared when we ran simulations using an identical demographic mod-  
328 el with BGS but without migration between populations (S7 Fig). This finding highlights  
329 an evolutionary role that deleterious alleles can play when they are transferred across  
330 populations through migration (see Discussion).

331 We also calculated  $\psi/\psi_0$  across these simulations and again qualitatively ob-  
332 served patterns similar to, but not as extreme, as our empirical calculations of  $\psi/\psi_0$ . As  
333 with pairwise neutral diversity, BGS predictably decreased the density of singletons  
334 across all populations (S12 Fig A). However, Africans exhibited a lower  $\psi/\psi_0$  when  
335 compared to non-Africans ( $\psi/\psi_0 = 0.79, 0.89, 0.91$  in AFR, EUR, and EASN respective-  
336 ly). Calculating  $\psi$  and  $\psi_0$  through time showed that the population bottlenecks experi-  
337 enced by non-Africans led to strong decreases in both  $\psi$  and  $\psi_0$ , with recent expansion  
338 in these populations then leading to large, rapid recoveries. Strong decreases in  $\psi/\psi_0$   
339 after each population bottleneck were also observed, including a slight decrease in  $\psi/\psi_0$   
340 in Africans that disappeared in the simulations without migration (S12 Fig B). While  $\psi/\psi_0$   
341 for the European/East Asian ancestral population in the simulations with migration re-  
342 mained below that of Africans during the course of the Out-of-Africa bottleneck, we ob-  
343 served a rapid recovery in  $\psi/\psi_0$  for this population in the simulations without migration  
344 (compare bottoms panels, S12 Fig A and B). This suggests that for populations experi-  
345 encing a sustained population bottleneck, the response of singletons to changes in the



346 weakened intensity of BGS is quite rapid, especially when compared to patterns of  $\pi/\pi_0$   
347 (compare Fig S7 C to Fig S12 B bottom panel). However, population migration mitigates  
348 this pattern. However, regardless of whether migration between populations was simu-  
349 lated, BGS seemed to have little effect on singleton density recovery in Europeans and  
350 Asians once population expansion occurred.

351 Our simulations were based on the functional density found in a 2 Mb region of  
352 the human genome with the lowest  $B$  values and, thus, where BGS was inferred to be  
353 strongest (chr3: 48,600,000-50,600,000). There, 20.46% of sites were either coding or  
354 conserved non-coding (see Materials and Methods). Thus, the fraction of the genome  
355 experiencing deleterious mutation in our simulations of strong BGS was 0.2046. The  
356 patterns we observed in these simulations likely represent an upper bound on the  
357 strength of BGS in the human genome. Since the strength of BGS is dependent upon  
358 the density of sites experiencing deleterious mutation within a given region (or more  
359 formally,  $U$ , which is the product of the per-site deleterious mutation rate and the num-  
360 ber of sites experiencing deleterious mutation [66]), we simulated weaker effects of  
361 BGS by reducing the fraction of sites experiencing purifying selection (keeping the dis-  
362 tribution of selective effects constant, see Materials and Methods). When the fraction of  
363 sites experiencing selection was decreased 2-4 fold in our simulations, we continued to  
364 observe a stepwise decrease in  $\pi/\pi_0$  while maintaining the specific rank order of African,  
365 followed by European, and then East Asian populations (S8 Fig). As expected,  $\pi/\pi_0$  in-  
366 creased for all populations as the fraction of sites that were simulated as deleterious  
367 decreased ( $\pi/\pi_0 = 0.641$  vs.  $0.802$ ,  $0.62$  vs.  $0.777$ , and  $0.611$  vs.  $0.777$  for AFR, EUR,  
368 and EASN when the fraction of sites experiencing selection was reduced to 0.1023 and

369 0.05115, respectively). These simulations resulted in  $\pi/\pi_0$  values much larger than we  
370 observed in data (Figs 1C, 2B).

371

## 372 **Discussion**

373 In our analyses of thousands of genomes from globally distributed human popu-  
374 lations, we have confirmed that the processes of demography and selection at linked  
375 sites govern neutral variation across the genome. While this observation is not unex-  
376 pected, we have characterized the dynamic consequence of non-equilibrium demo-  
377 graphic processes in regions experiencing selection at linked sites in humans. We find  
378 that demography (particularly population bottlenecks) can amplify the consequences of  
379 selection at linked sites. To remove any possible biases that would influence our results,  
380 we controlled for functional effects of mutations, variability in mutation along the ge-  
381 nome, potential sequencing artifacts, GC-based gene conversion, the potential muta-  
382 genic effects of recombination hotspots, and also removed regions of the genome with  
383 signatures of positive selection. None of these factors qualitatively affected our results.

384 We do recognize that one caveat of our controls is the fact that divergence itself  
385 is not independent of BGS [67], and this may present biases when using divergence to  
386 control for variation in mutation rate along the genome. This is because the rate of coa-  
387 lesence in the ancestral population of two groups will be faster in regions of strong  
388 BGS compared to regions of weak BGS due to the lower  $N_e$  of the former, leading to a  
389 decrease in overall divergence in those regions. To limit the contribution of such biases  
390 in ancestral  $N_e$  to divergence, we use rhesus macaque since it is more distantly related  
391 to humans than other primate species such as orangutan or chimpanzee (human-

392 rhesus divergence: 29.6 MYA; [68]). Furthermore, if  $B$  truly captures the effects of BGS,  
393 then normalizing by the lower divergence that is characteristic of strong BGS bins and  
394 the higher divergence that is characteristic of weak BGS bins should make any differ-  
395 ences between the two smaller, not greater. In fact, for our calculations of relative diver-  
396 sity in which we skip the normalization step, the differences in diversity between the  
397 lowest 1% and highest 1%  $B$  value bins are greater and give a lower ratio of relative di-  
398 versity ( $\pi/\pi_0$  for AFR is 0.373 without the divergence step and 0.402 with the divergence  
399 step). A similar pattern is also observed for other continental groups (compare Fig 2 and  
400 S5 Fig). More importantly though, we should not expect the potential biases of our di-  
401 vergence step to contribute to the differences in relative diversity between each of the  
402 continental groups since biases in divergence estimates across the genome are based  
403 on the human reference sequence and are therefore identical across all human popula-  
404 tions.

405 We also note that the estimates of  $B$  by McVicker et al. [6] may be biased by  
406 model assumptions concerning mutation rates and the specific sites subject to purifying  
407 selection, with the exact values of  $B$  unlikely to be precisely inferred. In fact, the  $B$  val-  
408 ues provided by McVicker et al. range from 0 to 1, suggesting that some regions of the  
409 genome should be essentially devoid of diversity (but we do not observe this to be the  
410 case). Since our own analyses show that relative diversity has a lower bound at only  
411  $\sim 0.35$  in humans, the exact value of  $B$  itself should not be taken at face value. Rather,  
412 our primary motivation for using  $B$  was to ascertain regions that should be on the ex-  
413 treme ends of the genome-wide distribution of regions experiencing selection at linked  
414 sites, for which  $B$  should provide a good assessment. A study by Comeron et al. [32]

415 that investigated BGS in *Drosophila* and utilized the same model of BGS as McVicker et  
416 al. found that biases presented by model assumptions or mis-inference on the exact  
417 value of  $B$  do not significantly change the overall rank order for the inferred strength of  
418 BGS across the genome. Thus we, expect McVicker et al.'s inference of  $B$  to provide  
419 good separation between the regions experiencing the weakest and strongest effects of  
420 selection at linked sites within the human genome, with model misspecification unlikely  
421 to change our empirical results.

422 While the effects of selection at linked sites in humans captured in our analyses  
423 could in principle include the consequences of positive selection, such as soft-sweeps  
424 and classic selective sweeps, we applied stringent filters to remove any such regions  
425 before our analysis (Materials and methods, S1 Appendix). We therefore expect that  
426 most of the resulting patterns we observe can be attributed to the consequences of  
427 BGS. Recently, a joint model of classic selective sweeps and BGS was applied to *Dro-*  
428 *sophila* and predicted that BGS has had a ~1.6 to 2.5-fold greater effect on neutral ge-  
429 netic diversity than classic selective sweeps [33], with another study giving similar re-  
430 sults [69]. We should expect this magnitude to be even greater for humans, since clas-  
431 sic selective sweeps were found to be rare in recent human evolution [41] and adaptive  
432 substitutions in the human genome are much less frequent than in *Drosophila* [5,70,71].  
433 Nonetheless, we cannot rule out all contributions from hitchhiking to our results. In fact,  
434 our own simulations of BGS fail to capture the complete effects of linked selection on  
435 reducing  $\pi/\pi_0$  in different human populations (compare Figs 1C and 5C) and the addi-  
436 tional contribution of hitchhiking to humans, which we did not simulate, may explain this  
437 discrepancy.

438 Non-equilibrium demography has also been of recent interest in regards to its  
439 impact on patterns of deleterious variation across human populations (often referred to  
440 as genetic load), with initial work showing that non-African populations have a greater  
441 proportion of non-synonymous deleterious variants that are homozygous compared to  
442 synonymous variants [56]. Similar results in human founder populations [57,72],  
443 *Arabidopsis* [73], and domesticated species such as dogs [12] and sunflowers [74]  
444 further demonstrate the pervasive impact that demography has on influencing the  
445 relative amount of deleterious variation across a variety of populations and species.  
446 Since BGS is a function of deleterious variation, it is not surprising that we also witness  
447 differences in  $\pi/\pi_0$  across human populations that have experienced different  
448 demographic histories. These effects are likely ubiquitous across other species as well.  
449 However, there has been recent contention about whether the previously described  
450 patterns of increased deleterious variation are driven by a decrease in the efficacy of  
451 natural selection (thus resulting in increased genetic load) or are solely artifacts of the  
452 response of deleterious variation to demographic change [58,75–78]. Recently, Koch et  
453 al. [55] investigated the temporal dynamics of demography on selected sites within  
454 humans and observed that after a population contraction, heterozygosity at selected  
455 sites can undershoot its expected value at equilibrium as low-frequency variants are lost  
456 at a quicker rate before the recovery of intermediate frequency variants can occur. In  
457 the context of both BGS and hitchhiking, which skew the site frequency spectrum of  
458 linked neutral mutations towards rare variants [26,66,79,80], we also expect a transient  
459 decrease in diversity as low-frequency variants are lost quickly during a population  
460 contraction. Indeed, as evident from our simulations of BGS and demography,

461 immediately after a population bottleneck, rapid losses in singleton density can occur,  
462 leading to transient decreases in  $\psi/\psi_0$ . However, the recovery in singleton density is  
463 also quite rapid, while the recovery in  $\pi$  and  $\pi/\pi_0$  is quite slow. This is due to the fact that  
464 higher frequency variants, which contribute a greater amount to  $\pi$ , take a longer amount  
465 of time to recover after a population contraction compared to lower-frequency variants  
466 such as singletons. However, Koch et al. also demonstrated that the effect of  
467 demography on diversity is only temporary and that long-term diversity at selected sites  
468 approaches greater values once equilibrium is reached. We also stress these temporal  
469 effects on the patterns of relative neutral diversity that we observe here. In the context  
470 of BGS, if no population recovery occurs following a contraction, deleterious variants  
471 may behave more neutrally, weakening the overall effect of BGS and causing  $\pi/\pi_0$  to  
472 become larger than in the ancestral, pre-bottleneck population.

473         The temporal effects of non-equilibrium demographics on patterns of  $\pi/\pi_0$  and  
474  $\psi/\psi_0$  may also explain the conflicting results obtained in a similar study of selection at  
475 linked sites in teosinte and its domesticated counterpart, maize [59]. In that study, the  
476 authors observed that  $\pi/\pi_0$  was higher in maize, which underwent a population bottle-  
477 neck during domestication (no bottleneck event was inferred for the teosinte population)  
478 but that  $\psi/\psi_0$  was also lower. This result is contrary to what we observed qualitatively  
479 between non-African and African human populations. However, the demographic mod-  
480 els that have been inferred for maize and humans are quite different. Maize is inferred  
481 to have had a recent, major domestication bottleneck that was essentially instantaneous  
482 and followed by rapid exponential growth [59]. In contrast, demographic models for non-  
483 African humans suggest a much more distant bottleneck that was sustained over a

484 longer period of time, and only recently have non-African populations experienced ram-  
485 pant growth (coinciding with the advent of agriculture). Given the vastly different demo-  
486 graphic models of the two species, it is therefore not surprising that patterns of variation  
487 would be different.

488         The greater contemporary  $N_e$  of non-Africans could theoretically result in a great-  
489 er efficacy of purifying selection and, consequently, a stronger efficacy of BGS, leading  
490 to their observed lower  $\pi/\pi_0$  relative to Africans. However, it is very unlikely that this  
491 explains the observed patterns of relative diversity that we see. The greater contempo-  
492 rary population size of non-Africans has transpired only in the very recent past, with ac-  
493 celerated growth in Europeans occurring within the last few hundred generations  
494 [23,81–84]. Rather, our simulations indicate that the response of  $\pi$  in regions under  
495 BGS is driven by the ancient, sustained population contractions humans have experi-  
496 enced, with reductions in  $\pi/\pi_0$  occurring concomitantly with the out-of-Africa bottleneck  
497 and European-East Asian split bottleneck events (Fig 5) and continuing even after the  
498 European and East Asian expansion events. In addition, our empirical measurements of  
499  $\psi/\psi_0$  demonstrate that in recent time, BGS has had a lower effect in non-Africans com-  
500 pared to Africans. Our simulations further corroborate this result. The greater sensitivity  
501 of regions under BGS to population contractions and accelerated genetic drift is a more  
502 likely explanation. Broadly, our results show that contemporary patterns of neutral di-  
503 versity cannot easily be attributable to contemporary forces of selection but instead may  
504 be exhibiting signatures that are still dominated by older demographic events. Interest-  
505 ingly though, our simulations reveal an additional factor that can influence the impact of  
506 BGS within populations – migration between populations. We observe that the ex-

507 change of deleterious variants from populations that have experienced extensive bottle-  
508 necks to populations with a more stable demography can magnify the strength of selec-  
509 tion at linked sites. In particular, our simulations show that both  $\pi/\pi_0$  and  $\psi/\psi_0$  decrease  
510 in Africans despite the fact that they are inferred to have been constant in size in their  
511 recent evolutionary history (Fig 5B). These patterns disappear when migration is re-  
512 moved (Fig S7, S12 Fig B), however more work is needed to definitively test this.

513 While we describe here the differential effects of non-equilibrium demography on  
514 neutral diversity in regions under strong and weak BGS, it is worth mentioning that dif-  
515 ferences in the reduction of neutral diversity in the genome between different popula-  
516 tions have also been investigated at the level of entire chromosomes. In particular,  
517 analyses of neutral diversity comparing autosomes to non-autosomes (i.e., sex chromo-  
518 somes and the mitochondrial genome [mtDNA]) have been conducted. Interestingly,  
519 these studies have shown that population contractions have impacted the relative re-  
520 duction of neutral diversity between non-autosomes and autosomes in a similar fashion  
521 to what we have observed between regions of strong BGS and weak BGS, with the  
522 greatest losses occurring in bottlenecked populations. This was demonstrated in hu-  
523 mans [85] and later modeled and shown in other species [86], with the explanation that  
524 stronger genetic drift due to the lower  $N_e$  of non-autosomes causes diversity to be lost  
525 more quickly in response to population size reductions. Recent work in humans has  
526 confirmed such predictions by showing that relative losses of neutral diversity in the  
527 non-autosomes are greatest for non-Africans [87–89]. These studies, plus others [90],  
528 have also shown that there is strong evidence for a more dominant effect of linked se-  
529 lection on the sex chromosomes relative to the autosomes in humans.



530           Since linked selection is a pervasive force in shaping patterns of diversity across  
531 the genomes in a range of biological species [1], it has been provided as an argument  
532 for why neutral diversity and estimates of  $N_e$  are relatively constrained across species in  
533 spite of the large variance in census population sizes that exist [47,91]. However, since  
534 population bottlenecks are common among species and have an inordinate influence on  
535  $N_e$  [20], demography has also been argued as a major culprit for constrained diversity  
536 [2,91–93]. Yet, as we show in humans, it is likely that patterns of neutral diversity are in  
537 fact jointly impacted by both of these forces, magnifying one another to deplete levels of  
538 diversity beyond what is expected by either one independently. This may play an even  
539 larger role in higher  $N_e$  species such as *Drosophila*, where the overall distribution of  $B$   
540 was inferred to be even smaller (i.e., exhibiting stronger BGS) than in humans [32]. In  
541 our work, we also identify a potentially substantial role for migration from smaller popu-  
542 lations that harbor more strongly deleterious alleles on patterns of linked neutral diversi-  
543 ty in large populations. Together, these combined effects may help provide additional  
544 clues for the puzzling lack of disparity in genetic diversity among different species [94].

545           Finally, our results also have implications for medical genetics research, since  
546 selection may be acting on functional regions contributing to disease susceptibility.  
547 Since different populations will have experienced different demographic histories, the  
548 action of linked selection may result in disparate patterns of genetic variation (with ele-  
549 vated levels of drift) near causal loci. Recent work has already demonstrated that BGS's  
550 consequence of lowering diversity impacts power for disease association tests [95]. Our  
551 results indicate that this impact may be even further exacerbated by demography in bot-  
552 tlenecked populations, leading to potentially larger discrepancies in power between dif-

553 ferent populations. Overall, this should encourage further scrutiny for tests and SNP  
554 panels optimized for one population since they may not be easily translatable to other  
555 populations. It should also further motivate investigators to simultaneously account for  
556 demography and linked selection when performing tests to uncover disease variants  
557 within the genome [95–97].

558

## 559 **Materials and methods**

### 560 **Data**

561 2,504 samples from 26 populations in phase 3 of the Thousand Genomes Project  
562 (TGP) [9] were downloaded from <ftp://ftp.ncbi.nlm.nih.gov/1000genomes/>. vcfTools  
563 (v0.1.12a) [98] and custom python scripts were used to gather all bi-allelic SNP sites  
564 from the autosomes of the entire sample set.

565 A subset of TGP samples that were sequenced to high coverage (~45X) by  
566 Complete Genomics (CG) were downloaded from  
567 <ftp://ftp.ncbi.nlm.nih.gov/1000genomes/>. After filtering out related individuals via pedi-  
568 gree analyses, we analyzed 53 YRI, 64 CEU, and 62 CHS samples (S2 Table). The  
569 cgatools (v1.8.0) listvariants program was first used to gather all SNPs from the 179  
570 samples using their CG ASM “Variations Files” (CG format version 2.2). Within each  
571 population, the number of reference and alternate allele counts for each SNP was then  
572 calculated using the cgatools testvariants program and custom python scripts. Only al-  
573 lele counts across high quality sites (i.e., those classified as VQHIGH variant quality by  
574 CG) were included. Low quality sites (i.e., those with VQLOW variant quality) were  
575 treated as missing data. Only autosomes were kept. Non-bi-allelic SNPs and sites vio-

576 lating Hardy-Weinberg equilibrium (HWE) (p-value < 0.05 with a Bonferroni correction  
577 for multiple SNP testing) were also removed.

578 We collected 13 whole-genome sequenced KhoeSan samples (sequence-  
579 coverage: 2.5-50X, see S3 Table in Supporting information) from 3 studies [99–101]  
580 and used the processed vcf files from each of those respective studies to gather all bi-  
581 allelic polymorphic SNPs (i.e., the union of variants across all vcf files). SNPs were only  
582 retained if they were polymorphic within the 13 samples (i.e., sites called as alternate  
583 only within the sample set were ignored).

584

#### 585 **Filtering and ascertainment scheme**

586 Positions in the genome were annotated for background selection by using the  
587 background selection coefficient,  $B$ , which was inferred by McVicker et al. [6] and down-  
588 loaded from <http://www.phrap.org/othersoftware.html>.  $B$  was inferred by applying a clas-  
589 sical model of BGS [60], which treats its effects as a simple reduction in  $N_e$  at neutral  
590 sites as a function of their recombination distance from conserved loci, the strength of  
591 purifying selection at those conserved loci, and the deleterious mutation rate.  $B$  can be  
592 interpreted as the reduced fraction of neutral genetic diversity at a particular site along  
593 the genome that is caused by BGS, with a value of 0 indicating a near complete remov-  
594 al of neutral genetic diversity due to BGS and a  $B$  value of 1 indicating little to no effect  
595 of BGS on neutral genetic diversity ( $B = \pi/\pi_0 = N_e/N_0$ ). Positions for  $B$  were lifted over  
596 from hg18 to hg19 using the UCSC liftOver tool. Sites that failed to uniquely map from  
597 hg18 to hg19 or failed to uniquely map in the reciprocal direction were excluded. Sites  
598 lacking a  $B$  value were also ignored. We focused our analyses on those regions of the

599 genome within the top 1%, 5%, 10%, and 25% of the genome-wide distribution of  $B$  and  
600 within the bottom 1% of the genome-wide distribution of  $B$ . These quantiles correspond  
601 to the  $B$  values 0.095, 0.317, 0.463, 0.691, and 0.994, respectively.

602 A set of 13 filters (referred to as the “13-filter set”) were used to limit errors from  
603 sequencing and misalignments with rhesus macaque and to remove regions potentially  
604 under the direct effects of natural selection and putative selective sweeps (we ignore  
605 the linked selection effects of background selection). These filters were applied to all  
606 samples in phase 3 TGP (all filters are in build hg19) for all sets of analyses (see S4  
607 Table in Supporting information for the total number of Mb that passed the described  
608 filters below for each particular  $B$  quantile):

- 609 1. Coverage/exome: For phase 3 data, regions of the genome that were part of  
610 the high coverage exome were excluded (see  
611 [ftp://ftp.ncbi.nlm.nih.gov/1000genomes/ftp/technical/reference/exome\\_pull\\_down\\_targets/20130108.exome.targets.bed.README](ftp://ftp.ncbi.nlm.nih.gov/1000genomes/ftp/technical/reference/exome_pull_down_targets/20130108.exome.targets.bed.README)). This was done to limit  
612 biases due to differing levels of coverage across the genome and to remove  
613 likely functional sites within the exome.
- 615 2. phyloP: Sites with phyloP [102] scores  $> 1.2$  or  $< -1.2$  were removed to limit  
616 the effects of natural selection due to conservation or accelerated evolution.  
617 Scores were downloaded from  
618 <http://hgdownload.cse.ucsc.edu/goldenPath/hg19/phyloP46way/>.
- 619 3. phastCons: Regions in the UCSC conservation 46-way track (table:  
620 [phastCons46wayPlacental](#)) [103] were removed to limit the effects of natural  
621 selection due to conservation.

- 622 4. CpG: CpG islands in the UCSC CpG islands track were removed because of  
623 their potential role in gene regulation and/or being conserved.
- 624 5. ENCODE blacklist: Regions with high signal artifacts from next-generation  
625 sequencing experiments discovered during the ENCODE project [104] were  
626 removed.
- 627 6. Accessible genome mask: Regions not accessible to next-generation se-  
628 quencing using short reads, according to the phase 3 TGP “strict” criteria,  
629 were removed (downloaded from  
630 [ftp://ftp.ncbi.nlm.nih.gov/1000genomes/ftp/release/20130502/supporting/acce-](ftp://ftp.ncbi.nlm.nih.gov/1000genomes/ftp/release/20130502/supporting/accessible_genome_masks/StrictMask/)  
631 [ssible\\_genome\\_masks/StrictMask/](ftp://ftp.ncbi.nlm.nih.gov/1000genomes/ftp/release/20130502/supporting/accessible_genome_masks/StrictMask/)).
- 632 7. Simple repeats: Regions in the UCSC simple repeats track were removed  
633 due to potential misalignments with outgroups and/or being under natural se-  
634 lection.
- 635 8. Gaps/centromeres/telomeres: Regions in the UCSC gap track were removed,  
636 including centromeres and telomeres.
- 637 9. Segmental duplications: Regions in the UCSC segmental dups track [105]  
638 were removed to limit potential effects of natural selection and/or misalign-  
639 ments with rhesus macaque.
- 640 10. Transposons: Active transposons (HERVK retrotransposons, the AluY sub-  
641 family of Alu elements, SVA elements, and L1Ta/L1pre-Ta LINEs) in the hu-  
642 man genome were removed.
- 643 11. Recent positive selection: Regions inferred to be under hard and soft selec-  
644 tive sweeps (using iHS and iHH12 regions from selscan v1.2.0 [106]; S1 Ap-

645           pendix) within each phase 3 population were removed.

646           12. Non-coding transcripts: Non-coding transcripts from the UCSC genes track  
647           were removed to limit potential effects of natural selection.

648           13. Synteny: Regions that did not share conserved synteny with rhesus macaque  
649           (rheMac2) from UCSC syntenic net filtering were removed (downloaded from  
650           <http://hgdownload.soe.ucsc.edu/goldenPath/hg19/vsRheMac2/syntenicNet/>).

651           Additionally, an extra set of filters was applied, but only for those estimates of diversity  
652           that controlled for GC-biased gene conversion and recombination hotspots:

653           14. GC-biased gene conversion (gBGC): Regions in UCSC phastBias track [107]  
654           from UCSC genome browser were removed to limit regions inferred to be un-  
655           der strong GC-biased gene conversion.

656           15. Recombination hotspots: All sites within 1.5 kb (i.e., 3 kb windows) of sites  
657           with recombination rates  $\geq 10$  cM/Mb in the 1000G OMNI genetic maps for  
658           non-admixed populations (downloaded from [ftp://ftp-  
659           trace.ncbi.nih.gov/1000genomes/ftp/technical/working/20130507\\_omni\\_reco  
660           mbination\\_rates/](ftp://ftp-trace.ncbi.nih.gov/1000genomes/ftp/technical/working/20130507_omni_recombination_rates/)) and the HapMap II genetic map [108] were removed. 1.5 kb  
661           flanking regions surrounding the center of hotspots identified by Ref. [109]  
662           (downloaded from [http://science.sciencemag.org/content/sci/suppl/2014/11/12/346.6211.125644  
663           2.DC1/1256442\\_DatafileS1.txt](http://science.sciencemag.org/content/sci/suppl/2014/11/12/346.6211.1256442.DC1/1256442_DatafileS1.txt)) were also removed, except for the cases in  
664           which the entire hotspot site was greater than 3 kb in length (in which case  
665           just the hotspot was removed).

667           To generate a set of four-fold degenerate synonymous sites, all polymorphic

668 sites that we retained from the high-coverage Complete Genomic samples were anno-  
669 tated using the program ANNOVAR [110] with Gencode V19 annotations. ANNOVAR  
670 and Gencode V19 annotations were also used to gather an autosome-wide set of four-  
671 fold degenerate sites, resulting in 5,188,972 total sites.

672

### 673 **Demographic inference**

674 The inference tool *dadi* (v1.6.3) [7] was used to fit, via maximum likelihood, the 3-  
675 population 13-parameter demographic model of Gutenkunst et al. [7] to the 179 YRI,  
676 CEU, and CHS samples from the high coverage CG dataset of TGP. This sample set  
677 consisted of 53 YRI (African), 64 CEU (European), and 62 CHS (East Asian) samples.  
678 The demographic model incorporates an ancient human expansion in Africa and a sin-  
679 gle out-of-Africa bottleneck followed by European- and East Asian-specific bottlenecks,  
680 as well as exponential growth in both non-African populations and migration between  
681 populations. During the inference procedure, each population was projected down to  
682 106 chromosomes, corresponding to the maximum number of chromosomes available  
683 in the CG YRI population. Sites were polarized with chimpanzee to identify putative an-  
684 cestral/derived alleles using the chain and netted alignments of hg19 with panTro4  
685 (<http://hgdownload.soe.ucsc.edu/goldenPath/hg19/vsPanTro4/axtNet/>), and the correc-  
686 tion for ancestral misidentification [111] option in *dadi* was used. The 13-filter set de-  
687 scribed previously was applied to the CG data set, and an additional filter keeping only  
688 the autosomal sites in the top 1% of  $B$  ( $B \geq 0.994$ ) was also applied in order to mitigate  
689 potential biases in inference due to BGS [52,65] or other forms of linked selection [51].  
690 After site filtering and correction for ancestral misidentification, a total of 110,582 segre-

691 gating sites were utilized by dadi for the inference procedure. For optimization, grid  
692 points of 120, 130, and 140 were used, and 15 independent optimization runs were  
693 conducted from different initial parameter points to ensure convergence upon a global  
694 optimum. An effective sequence length ( $L$ ) of 7.15 Mb was calculated from the input se-  
695 quence data after accounting for the fraction of total sites removed due to filtering. In  
696 addition to the 13-filter set, this filtering included sites violating HWE, sites without  $B$   
697 value information, sites that did not have at least 106 sampled chromosomes in each  
698 population, sites with more than two alleles, sites that did not have tri-nucleotide infor-  
699 mation for the correction for ancestral misidentification step, and sites treated as miss-  
700 ing data. For calculating the reference effective population size, a mutation rate ( $\mu$ ) of  
701  $1.66 \times 10^{-8}$  (inferred from Ref. [112]) was used. Using the optimized  $\theta$  from dadi after  
702 parameter fitting, the equation  $\theta = 4N_e\mu L$  was solved for  $N_e$  to generate the reference  
703 effective population size, from which all other population  $N_e$ 's were calculated. This  
704 same procedure was also used to infer demographic parameters from four-fold degen-  
705 erate synonymous sites across the same set of samples. After site filtering (note that  $B$   
706 and the 13-filter set were not included in the filtering step for four-fold degenerate syn-  
707 onymous sites), 41,260 segregating sites were utilized by dadi for the inference proce-  
708 dure, and an effective sequence length of 2.37 Mb was used for calculating the refer-  
709 ence effective population size.

710

## 711 **Simulations**

712 Forward simulations incorporating the results from the demographic inference  
713 procedure described above and a model of background selection were conducted using



714 SFS\_CODE [113]. For the model of background selection, the recombination rate,  $\rho$ ,  
715 and the fraction of the genome experiencing deleterious mutation were calculated using  
716 the 2 Mb region of chr3: 48,600,000-50,600,000, which has been subject to the strong-  
717 est amount of BGS in the human genome (mean  $B = 0.002$ ). A population-scaled re-  
718 combination rate ( $\rho$ ) of  $6.0443 \times 10^{-5}$  was calculated for this region using the HapMap II  
719 GRCh37 genetic map [108]. For ascertaining the fraction of sites experiencing deleteri-  
720 ous mutation, the number of non-coding “functional” sites in this region was first calcu-  
721 lated by taking the union of all phastCons sites and phyloP sites with scores  $> 1.2$  (indi-  
722 cating conservation) that did not intersect with any coding exons. This amount totaled to  
723 270,348 base pairs. Additionally, the number of coding sites was calculated by summing  
724 all coding exons within this region from GENCODE v19, which totaled to 138,923 base  
725 pairs. From these totals, the total fraction of deleterious sites, 0.2046, was generated.

726         The background selection model was simulated using a middle 30 kb neutral re-  
727 gion flanked by two 1 Mb regions under purifying selection. From the calculated fraction  
728 of deleterious sites described above, 20.46% of sites in the two 1 Mb flanking regions  
729 were simulated as being deleterious. The mutation rate in our simulations for the delete-  
730 rious sites and for neutral sites were both set to  $1.66 \times 10^{-8}$  [112]. Two distributions of  
731 fitness effects were used for the deleterious sites, with 66.06% of deleterious sites using  
732 the gamma distribution of fitness effects inferred across conserved non-coding regions  
733 by Ref. [114] ( $\beta = 0.0415$ ,  $\alpha = 0.00515625$ ) and 33.94% of deleterious sites using the  
734 gamma distribution of fitness effects inferred across coding regions by Ref. [5] ( $\beta =$   
735  $0.184$ ,  $\alpha = 0.00040244$ ). The relative number of non-coding “functional” sites and coding  
736 exons described above determined the relative number of sites receiving each distribu-

737 tion of fitness effects in our simulations. Gamma distribution parameters were scaled to  
738 the ancestral population size of the demographic models used in Refs. [5,114]. An ex-  
739 ample of the SFS\_CODE command for our simulations is in S1 Supporting information.  
740 To simulate varying levels of background selection strength, different total fractions of  
741 our original calculated deleterious fraction of 0.2046 were used (i.e., 5%, 10%, 25%,  
742 50%, and 100% of 0.2046). However, the same relative percentage of non-coding and  
743 coding sites and mutation rate were used. These different simulated fractions of dele-  
744 rious sites resulted in a reduced total deleterious mutation rate,  $U$ , which is the product  
745 of the per-site deleterious mutation rate and the total number of sites experiencing dele-  
746 terious mutation [66]. Thus, weaker effects of BGS were simulated. To simulate only the  
747 effects of demography without background selection, only the 30 kb neutral region was  
748 simulated. 2,000 independent simulations were conducted for each particular set of the  
749 deleterious site fraction (2,000 x 6 = 12,000 total). Simulations output population genetic  
750 information every 100 generations and also at each generation experiencing a popula-  
751 tion size change (22,117 total generations were simulated), from which mean pairwise  
752 nucleotide diversity ( $\pi$ ) and singleton density ( $\psi$ ) was calculated across the 2,000 simu-  
753 lations.

754

### 755 **Population-specific calculations of diversity and singleton density**

756 Mean pairwise genetic diversity ( $\pi$ ) and singleton density ( $\psi$ ) was calculated as a  
757 function of the  $B$  quantile bins described in “Filtering and ascertainment scheme” for  
758 each of the 20 non-admixed populations in phase 3 TGP and, for  $\pi$ , across 4 broad  
759 populations that grouped the 20 non-admixed populations together by continent (Afri-

760 can, European, South Asian, and East Asian, see S12 Table in Supporting information).  
761 Additionally, only regions of the genome passing the 13-filter set were used in the calcu-  
762 lations of  $\pi$  and  $\psi$  (see S4 Table in Supporting information for total number of Mb used  
763 in diversity calculations for each  $B$  quantile). When calculating  $\psi$  for each non-admixed  
764 phase 3 TGP population, the site-frequency spectrum was first projected down to  $2N =$   
765 170 samples (the number of chromosomes in MSL, the smallest phase 3 population  
766 sample) using a hypergeometric distribution [7] from each population's full site-  
767 frequency spectrum. This allowed for unbiased comparisons of singleton density be-  
768 tween all populations. For estimates of diversity controlling for gBGC or recombination  
769 hotspots, the additional corresponding filters described in "Filtering and ascertainment  
770 scheme" were also used. Only 100 kb regions of the genome with at least 10 kb of di-  
771 vergence information with Rhesus macaque were used in  $\pi$  and  $\psi$  calculations (see  
772 "Normalization of diversity and divergence calculations with Rhesus macaque" below).

773

#### 774 **Normalization of diversity/singleton density and divergence calculations with** 775 **Rhesus macaque**

776 To calculate human divergence with Rhesus macaque, we downloaded the  
777 syntenic net alignments between hg19 and rheMac2 that were generated by blastz from  
778 <http://hgdownload.cse.ucsc.edu/goldenpath/hg19/vsRheMac2/syntenicNet/>. We binned  
779 the human genome into non-overlapping 100 kb bins and calculated divergence within  
780 each bin by taking the proportion of base pair differences between human and Rhesus  
781 macaque. Gaps between human and Rhesus macaque, positions lacking alignment in-  
782 formation, and positions that did not pass the 13-filter set described in "Filtering and

783 ascertainment scheme” were ignored in the divergence estimate. Additionally, a sepa-  
784 rate set of divergence estimates were also made using the additional set of filtering cri-  
785 teria that removed those regions under gBGC or in recombination hotspots and were  
786 used for normalizing diversity in those measurements that controlled for gBGC and  
787 hotspots.

788 When normalizing diversity and singleton density by divergence, only 100 kb bins  
789 that had at least 10 kb of divergence information were used (21,100 bins total for 13-  
790 filter set, 20,935 bins total for the 13-filter set plus the additional gBGC and hotspot fil-  
791 ters). Bins with less than 10 kb of divergence information were ignored. To make esti-  
792 mates comparable, in those measurements of diversity that did not normalize by diver-  
793 gence, diversity was still calculated using the same set of 100 kb bins that had at least  
794 10 kb for estimating divergence.

795

## 796 **Calculations of population differentiation ( $F_{ST}$ ) and linear regression**

797  $F_{ST}$  calculations were performed as a function of  $B$  between every pair of non-  
798 admixed phase 3 TGP populations not belonging to the same continental group (150  
799 pairs total). We followed the recommendations in Bhatia et al. [63] to limit biases in  $F_{ST}$   
800 due to 1) type of estimator used, 2) averaging over SNPs, and 3) SNP ascertainment.  
801 Specifically, we 1) used the Hudson-based  $F_{ST}$  estimator [115], 2) used a ratio of  
802 averages for combining  $F_{ST}$  estimated across different SNPs, and 3) ascertained SNPs  
803 based on being polymorphic in an outgroup (i.e., the KhoeSan). For ascertaining SNPs  
804 in the KhoeSan, we also performed filtering according to the filtering scheme described  
805 under “Filtering and ascertainment scheme.” For a position to be considered

806 polymorphic in the KhoeSan, at least one alternate allele and one reference allele had  
807 to be called across the 13 genomes we utilized (see “Data”). These criteria left  
808 3,497,105 total sites in the genome in the phase 3 dataset for  $F_{ST}$  to be estimated  
809 across.

810  $F_{ST}$  was calculated across 2% quantile bins of  $B$  (based on the genome-wide  
811 distribution of  $B$ ) for all pairwise comparisons of populations between a specific pair of  
812 continental groups (25 pairs total) or across all pairwise comparisons using all continen-  
813 tal groups (150 pairs total). Simple linear regression was performed with the model  $F_{ST}$   
814  $= \beta_0 + \beta_1 B + \varepsilon$ . The mean of the bounds defining each quantile bin was used when de-  
815 fining the explanatory variables for the regression. Linear regression, robust linear re-  
816 gression [64], and simple correlation were performed using the `lm()`, `rlm()`, and `cor()`  
817 functions, respectively, in the R programming language ([www.r-project.org](http://www.r-project.org)). To gener-  
818 ate standard errors of the mean, this same procedure was performed on  $F_{ST}$  results  
819 generated from each of 1,000 bootstrapped iterations of the data.

820

## 821 **Bootstrapping**

822 **Diversity Estimates.** To control for the structure of linkage disequilibrium and correla-  
823 tion between SNPs along the genome, we partitioned the human genome into non-  
824 overlapping 100 kb bins (these bins were identical to the 100 kb bins used for estimat-  
825 ing divergence) and calculated mean pairwise diversity ( $\pi$ ) or heterozygosity within each  
826 bin. We also normalized the diversity estimates by divergence within each bin. We then  
827 bootstrapped individual genomes by sampling, with replacement, the 100 kb bins until  
828 the number of sampled bins equaled the number of bins used for calculating the diversi-

829 ty point estimates (i.e., 21,100 bins or 20,935 bins total, depending on whether filters for  
830 gBGC and hotspots were applied). 1,000 total bootstrap iterations were completed and  
831 standard errors of the mean were calculated by taking the standard deviation from the  
832 resulting bootstrap distribution.

833  $F_{ST}$ . For bootstrapping  $F_{ST}$ , the human genome was partitioned into non-overlapping  
834 100 kb bins and were sampled with replacement until 28,823 bins were selected (the  
835 total number of non-overlapping 100 kb bins in the human autosomes).  $F_{ST}$  was then  
836 calculated genome-wide for the bootstrapped genome as a function of  $B$  for every pair-  
837 wise comparison of non-admixed phase 3 TGP populations not belonging to the same  
838 continental group. 1,000 total bootstrap iterations were completed and standard errors  
839 of the mean were calculated by taking the standard deviation from the  $F_{ST}$  distribution  
840 calculated from all 1,000 iterations.

841

## 842 **Acknowledgements**

843 We thank Lawrence Uricchio, Dominic Tong, Melissa Spear, Nicolas Strauli and three  
844 anonymous reviewers for helpful comments on the manuscript. The computations in this  
845 paper were run on the QB3 Shared Cluster at the University of California, San Francis-  
846 co.

847

## 848 **References**

- 849 1. Cutter AD, Payseur BA. Genomic signatures of selection at linked sites: unifying  
850 the disparity among species. *Nat Rev Genet.* 2013;14: 262–274.  
851 doi:10.1038/nrg3425
- 852 2. Ellegren H, Galtier N. Determinants of genetic diversity. *Nat Rev Genet.* 2016;17:  
853 422–433. doi:10.1038/nrg.2016.58
- 854 3. Sabeti PC, Reich DE, Higgins JM, Levine HZP, Richter DJ, Schaffner SF, et al.

- 855 Detecting recent positive selection in the human genome from haplotype  
856 structure. *Nature*. 2002;419: 832–837. doi:10.1038/nature01027.1.
- 857 4. Williamson SH, Hernandez R, Fedel-Alon A, Zhu L, Nielsen R, Bustamante CD.  
858 Simultaneous inference of selection and population growth from patterns of  
859 variation in the human genome. *Proc Natl Acad Sci*. 2005;102: 7882–7887.  
860 doi:10.1073/pnas.0502300102
- 861 5. Boyko AR, Williamson SH, Indap AR, Degenhardt JD, Hernandez RD, Lohmueller  
862 KE, et al. Assessing the evolutionary impact of amino acid mutations in the  
863 human genome. *PLoS Genet*. 2008;4: e1000083.  
864 doi:10.1371/journal.pgen.1000083
- 865 6. McVicker G, Gordon D, Davis C, Green P. Widespread genomic signatures of  
866 natural selection in hominid evolution. *PLoS Genet*. 2009;5: e1000471.  
867 doi:10.1371/journal.pgen.1000471
- 868 7. Gutenkunst RN, Hernandez RD, Williamson SH, Bustamante CD. Inferring the  
869 joint demographic history of multiple populations from multidimensional SNP  
870 frequency data. *PLoS Genet*. 2009;5: e1000695.  
871 doi:10.1371/journal.pgen.1000695
- 872 8. Li H, Durbin R. Inference of human population history from individual whole-  
873 genome sequences. *Nature*. 2011;475: 493–496. doi:10.1038/nature10231
- 874 9. Auton A, Abecasis GR, Altshuler DM, Durbin RM, Abecasis GR, Bentley DR, et al.  
875 A global reference for human genetic variation. *Nature*. 2015;526: 68–74.  
876 doi:10.1038/nature15393
- 877 10. Lack JB, Lange JD, Tang AD, Corbett-Detig RB, Pool JE. A thousand fly  
878 genomes: An expanded *Drosophila* genome nexus. *Mol Biol Evol*. 2016;33: 3308–  
879 3313. doi:10.1093/molbev/msw195
- 880 11. Gibbs RA, Taylor JF, Van Tassell CP, Barendse W, Eversole KA, Gill CA, et al.  
881 Genome-wide survey of SNP variation uncovers the genetic structure of cattle  
882 breeds. *Science*. 2009;324: 528–532. doi:10.1126/science.1167936
- 883 12. Marsden CD, Ortega-Del Vecchyo D, O'Brien DP, Taylor JF, Ramirez O, Vilà C,  
884 et al. Bottlenecks and selective sweeps during domestication have increased  
885 deleterious genetic variation in dogs. *Proc Natl Acad Sci*. 2016;113: 152–157.  
886 doi:10.1073/pnas.1512501113
- 887 13. Caicedo AL, Williamson SH, Hernandez RD, Boyko A, Fedel-Alon A, York TL, et  
888 al. Genome-wide patterns of nucleotide polymorphism in domesticated rice. *PLoS*  
889 *Genet*. 2007;3: 1745–1756. doi:10.1371/journal.pgen.0030163
- 890 14. Begun DJ, Aquadro CF. African and North American populations of *Drosophila*  
891 *melanogaster* are very different at the DNA level. *Nature*. 1993;365: 548–550.  
892 doi:10.1038/365548a0
- 893 15. Haddrill PR, Thornton KR, Charlesworth B, Andolfatto P. Multilocus patterns of  
894 nucleotide variability and the demographic and selection history of *Drosophila*  
895 *melanogaster* populations. *Genome Res*. 2005;15: 790–799.  
896 doi:10.1101/gr.3541005
- 897 16. Ometto L, Glinka S, De Lorenzo D, Stephan W. Inferring the effects of  
898 demography and selection on *Drosophila melanogaster* populations from a  
899 chromosome-wide scan of DNA variation. *Mol Biol Evol*. 2005;22: 2119–2130.  
900 doi:10.1093/molbev/msi207



- 901 17. Hernandez RD, Hubisz MJ, Wheeler DA, Smith DG, Ferguson B, Rogers J, et al.  
902 Demographic histories and patterns of linkage disequilibrium in Chinese and  
903 Indian rhesus macaques. *Science*. 2007;316: 240–243.  
904 doi:10.1126/science.1140462
- 905 18. Ramachandran S, Deshpande O, Roseman CC, Rosenberg NA, Feldman MW,  
906 Cavalli-Sforza LL. Support from the relationship of genetic and geographic  
907 distance in human populations for a serial founder effect originating in Africa. *Proc*  
908 *Natl Acad Sci*. 2005;102: 15942–15947. doi:10.1073/pnas.0507611102
- 909 19. Henn BM, Cavalli-Sforza LL, Feldman MW. The great human expansion. *Proc*  
910 *Natl Acad Sci*. 2012;109: 17758–17764. doi:10.1073/pnas.1212380109
- 911 20. Charlesworth B. Effective population size and patterns of molecular evolution and  
912 variation. *Nat Rev Genet*. 2009;10: 195–205. doi:10.1038/nrg2526
- 913 21. Nei M, Maruyama T, Chakraborty R. The bottleneck effect and genetic variability  
914 in populations. *Evolution (N Y)*. 1975;29: 1–10. doi:10.2307/2407137
- 915 22. Gravel S, Henn BM, Gutenkunst RN, Indap AR, Marth GT, Clark AG, et al.  
916 Demographic history and rare allele sharing among human populations. *Proc Natl*  
917 *Acad Sci*. 2011;108: 11983–11988. doi:10.1073/pnas.1019276108
- 918 23. Tennessen JA, Bigham AW, O'Connor TD, Fu W, Kenny EE, Gravel S, et al.  
919 Evolution and functional impact of rare coding variation from deep sequencing of  
920 human exomes. *Science*. 2012;337: 64–69. doi:10.1126/science.1219240
- 921 24. Charlesworth D. Balancing selection and its effects on sequences in nearby  
922 genome regions. *PLoS Genet*. 2006;2: 379–384.  
923 doi:10.1371/journal.pgen.0020064
- 924 25. Maynard Smith J, Haigh J. The hitch-hiking effect of a favourable gene. *Genet*  
925 *Res*. 1974;23: 23–35. doi:10.1017/S0016672308009579
- 926 26. Charlesworth B, Morgan MT, Charlesworth D. The effect of deleterious mutations  
927 on neutral molecular variation. *Genetics*. 1993;134: 1289–1303.
- 928 27. Kim Y, Stephan W. Joint effects of genetic hitchhiking and background selection  
929 on neutral variation. *Genetics*. 2000;155: 1415–1427.
- 930 28. Begun DJ, Aquadro CF. Levels of naturally occurring DNA polymorphism  
931 correlate with recombination rates in *D. melanogaster*. *Nature*. 1992;356: 519–  
932 520. doi:10.1038/356519a0
- 933 29. Charlesworth B. Background selection and patterns of genetic diversity in  
934 *Drosophila melanogaster*. *Genet Res*. 1996;68: 131–149.  
935 doi:10.1017/S0016672300034029
- 936 30. Andolfatto P. Hitchhiking effects of recurrent beneficial amino acid substitutions in  
937 the *Drosophila melanogaster* genome. *Genome Res*. 2007;17: 1755–1762.  
938 doi:10.1101/gr.6691007
- 939 31. Sella G, Petrov DA, Przeworski M, Andolfatto P. Pervasive natural selection in the  
940 *Drosophila* genome? *PLoS Genet*. 2009;5: e1000495.  
941 doi:10.1371/journal.pgen.1000495
- 942 32. Comeron JM. Background selection as baseline for nucleotide variation across  
943 the *drosophila* genome. *PLoS Genet*. 2014;10: e1004434.  
944 doi:10.1371/journal.pgen.1004434
- 945 33. Elyashiv E, Sattath S, Hu TT, Strutsovsky A, McVicker G, Andolfatto P, et al. A  
946 genomic map of the effects of linked selection in *Drosophila*. *PLoS Genet*.



- 947 2016;12: e1006130. doi:10.1371/journal.pgen.1006130
- 948 34. Flowers JM, Molina J, Rubinstein S, Huang P, Schaal BA, Purugganan MD.  
949 Natural selection in gene-dense regions shapes the genomic pattern of  
950 polymorphism in wild and domesticated rice. *Mol Biol Evol.* 2012;29: 675–687.  
951 doi:10.1093/molbev/msr225
- 952 35. Xu X, Liu X, Ge S, Jensen JD, Hu F, Li X, et al. Resequencing 50 accessions of  
953 cultivated and wild rice yields markers for identifying agronomically important  
954 genes. *Nat Biotechnol.* 2012;30: 105–111. doi:10.1038/nbt.2050
- 955 36. Andersen EC, Gerke JP, Shapiro JA, Crissman JR, Ghosh R, Bloom JS, et al.  
956 Chromosome-scale selective sweeps shape *Caenorhabditis elegans* genomic  
957 diversity. *Nat Genet.* 2012;44: 285–290. doi:10.1038/ng.1050
- 958 37. Cutter AD, Payseur BA. Selection at linked sites in the partial selfer  
959 *Caenorhabditis elegans*. *Mol Biol Evol.* 2003;20: 665–673.  
960 doi:10.1093/molbev/msg072
- 961 38. Reed FA, Akey JM, Aquadro CF. Fitting background-selection predictions to  
962 levels of nucleotide variation and divergence along the human autosomes.  
963 *Genome Res.* 2005;15: 1211–1221. doi:10.1101/gr.3413205
- 964 39. Voight BF, Kudaravalli S, Wen X, Pritchard JK. A map of recent positive selection  
965 in the human genome. *PLoS Biol.* 2006;4: 0446–0458.  
966 doi:10.1371/journal.pbio.0040072
- 967 40. Cai JJ, Macpherson JM, Sella G, Petrov DA. Pervasive hitchhiking at coding and  
968 regulatory sites in humans. *PLoS Genet.* 2009;5: e1000336.  
969 doi:10.1371/journal.pgen.1000336
- 970 41. Hernandez RD, Kelley JL, Elyashiv E, Melton SC, Auton A, McVean G, et al.  
971 Classic selective sweeps were rare in recent human evolution. *Science.*  
972 2011;331: 920–924. doi:10.1126/science.1198878
- 973 42. Lohmueller KE, Albrechtsen A, Li Y, Kim SY, Korneliussen T, Vinckenbosch N, et  
974 al. Natural selection affects multiple aspects of genetic variation at putatively  
975 neutral sites across the human genome. *PLoS Genet.* 2011;7: e1002326.  
976 doi:10.1371/journal.pgen.1002326
- 977 43. Alves I, Šrámková Hanulová A, Foll M, Excoffier L. Genomic data reveal a  
978 complex making of humans. *PLoS Genet.* 2012;8: e1002837.  
979 doi:10.1371/journal.pgen.1002837
- 980 44. Granka JM, Henn BM, Gignoux CR, Kidd JM, Bustamante CD, Feldman MW.  
981 Limited evidence for classic selective sweeps in African populations. *Genetics.*  
982 2012;192: 1049–1064. doi:10.1534/genetics.112.144071
- 983 45. Enard D, Messer PW, Petrov DA. Genome-wide signals of positive selection in  
984 human evolution. *Genome Res.* 2014;24: 885–895. doi:10.1101/gr.164822.113
- 985 46. Bank C, Ewing GB, Ferrer-Admetlla A, Foll M, Jensen JD. Thinking too positive?  
986 Revisiting current methods of population genetic selection inference. *Trends*  
987 *Genet.* 2014;30: 540–546. doi:10.1016/j.tig.2014.09.010
- 988 47. Corbett-Detig RB, Hartl DL, Sackton TB. Natural selection constrains neutral  
989 diversity across a wide range of species. *PLoS Biol.* 2015;13: e1002112.  
990 doi:10.1371/journal.pbio.1002112
- 991 48. Comeron JM. Background selection as null hypothesis in population genomics:  
992 insights and challenges from *Drosophila* studies. *Philos Trans R Soc B.* 2017;372:

- 993 20160471. doi:10.1098/rstb.2016.0471
- 994 49. Zeng K. A coalescent model of background selection with recombination,  
995 demography and variation in selection coefficients. *Heredity* (Edinb). 2013;110:  
996 363–371. doi:10.1038/hdy.2012.102
- 997 50. Nicolaisen LE, Desai MM. Distortions in genealogies due to purifying selection  
998 and recombination. *Genetics*. 2013;195: 221–230.  
999 doi:10.1534/genetics.113.152983
- 1000 51. Schrider DR, Shanku AG, Kern AD. Effects of linked selective sweeps on  
1001 demographic inference and model selection. *Genetics*. 2016;204: 1207–1223.  
1002 doi:10.1534/genetics.116.190223
- 1003 52. Ewing GB, Jensen JD. The consequences of not accounting for background  
1004 selection in demographic inference. *Mol Ecol*. 2016;25: 135–141.  
1005 doi:10.1111/mec.13390
- 1006 53. Pennings PS, Kryazhimskiy S, Wakeley J. Loss and recovery of genetic diversity  
1007 in adapting populations of HIV. *PLoS Genet*. 2014;10: e1004000.  
1008 doi:10.1371/journal.pgen.1004000
- 1009 54. Brandvain Y, Wright SI. The limits of natural selection in a nonequilibrium world.  
1010 *Trends Genet*. 2016;32: 201–210. doi:10.1016/j.tig.2016.01.004
- 1011 55. Koch E, Novembre J. A temporal perspective on the interplay of demography and  
1012 selection on deleterious variation in humans. *G3*. 2017;7: 1027–1037.  
1013 doi:10.1534/g3.117.039651
- 1014 56. Lohmueller KE, Indap AR, Schmidt S, Boyko AR, Hernandez RD, Hubisz MJ, et  
1015 al. Proportionally more deleterious genetic variation in European than in African  
1016 populations. *Nature*. 2008;451: 994–997. doi:10.1038/nature06611
- 1017 57. Casals F, Hodgkinson A, Hussin J, Idaghdour Y, Bruat V, de Maillard T, et al.  
1018 Whole-exome sequencing reveals a rapid change in the frequency of rare  
1019 functional variants in a founding population of humans. *PLoS Genet*. 2013;9:  
1020 e1003815. doi:10.1371/journal.pgen.1003815
- 1021 58. Simons YB, Sella G. The impact of recent population history on the deleterious  
1022 mutation load in humans and close evolutionary relatives. *Curr Opin Genet Dev*.  
1023 2016;41: 150–158. doi:10.1016/j.gde.2016.09.006
- 1024 59. Beissinger TM, Wang L, Crosby K, Durvasula A, Hufford MB, Ross-Ibarra J.  
1025 Recent demography drives changes in linked selection across the maize genome.  
1026 *Nat Plants*. 2016;2: 16084. doi:10.1038/nplants.2016.84
- 1027 60. Nordborg M, Charlesworth B, Charlesworth D. The effect of recombination on  
1028 background selection. *Genet Res*. 1996;67: 159–174.  
1029 doi:10.1017/S0016672300033619
- 1030 61. Charlesworth B, Nordborg M, Charlesworth D. The effects of local selection,  
1031 balanced polymorphism and background selection on equilibrium patterns of  
1032 genetic diversity in subdivided populations. *Genet Res*. 1997;70: 155–174.  
1033 doi:10.1017/S0016672397002954
- 1034 62. Hu XS, He F. Background selection and population differentiation. *J Theor Biol*.  
1035 2005;235: 207–219. doi:10.1016/j.jtbi.2005.01.004
- 1036 63. Bhatia G, Patterson N, Sankararaman S, Price AL. Estimating and interpreting  
1037 *F<sub>ST</sub>*: The impact of rare variants. *Genome Res*. 2013;23: 1514–1521.  
1038 doi:10.1101/gr.154831.113

- 1039 64. Yu C, Yao W. Robust linear regression: A review and comparison. *Commun Stat -*  
1040 *Simul Comput.* 2017;46: 6261–6282. doi:10.1080/03610918.2016.1202271
- 1041 65. Messer PW, Petrov DA. Frequent adaptation and the McDonald-Kreitman test.  
1042 *Proc Natl Acad Sci.* 2013;110: 8615–8620. doi:10.1073/pnas.1220835110
- 1043 66. Charlesworth B. The effects of deleterious mutations on evolution at linked sites.  
1044 *Genetics.* 2012;190: 5–22. doi:10.1534/genetics.111.134288
- 1045 67. Phung TN, Huber CD, Lohmueller KE. Determining the effect of natural selection  
1046 on linked neutral divergence across species. *PLoS Genet.* 2016;12: e1006199.  
1047 doi:10.1371/journal.pgen.1006199
- 1048 68. Burgess R, Yang Z. Estimation of hominoid ancestral population sizes under  
1049 Bayesian coalescent models incorporating mutation rate variation and sequencing  
1050 errors. *Mol Biol Evol.* 2008;25: 1979–1994. doi:10.1093/molbev/msn148
- 1051 69. Campos JL, Zhao L, Charlesworth B. Estimating the parameters of background  
1052 selection and selective sweeps in *Drosophila* in the presence of gene conversion.  
1053 *Proc Natl Acad Sci.* 2017;114: E4762–E4771. doi:10.1073/pnas.1619434114
- 1054 70. Eyre-Walker A, Keightley PD. Estimating the rate of adaptive molecular evolution  
1055 in the presence of slightly deleterious mutations and population size change. *Mol*  
1056 *Biol Evol.* 2009;26: 2097–2108. doi:10.1093/molbev/msp119
- 1057 71. Galtier N. Adaptive protein evolution in animals and the effective population size  
1058 hypothesis. *PLoS Genet.* 2016;12: e1005774. doi:10.1371/journal.pgen.1005774
- 1059 72. Lim ET, Würtz P, Havulinna AS, Palta P, Tukiainen T, Rehnström K, et al.  
1060 Distribution and medical impact of loss-of-function variants in the Finnish founder  
1061 population. *PLoS Genet.* 2014;10: e1004494. doi:10.1371/journal.pgen.1004494
- 1062 73. Cao J, Schneeberger K, Ossowski S, Günther T, Bender S, Fitz J, et al. Whole-  
1063 genome sequencing of multiple *Arabidopsis thaliana* populations. *Nat Genet.*  
1064 2011;43: 956–963. doi:10.1038/ng.911
- 1065 74. Renaut S, Rieseberg LH. The accumulation of deleterious mutations as a  
1066 consequence of domestication and improvement in sunflowers and other  
1067 compositae crops. *Mol Biol Evol.* 2015;32: 2273–2283.  
1068 doi:10.1093/molbev/msv106
- 1069 75. Balick DJ, Do R, Cassa CA, Reich D, Sunyaev SR. Dominance of deleterious  
1070 alleles controls the response to a population bottleneck. *PLoS Genet.* 2015;11:  
1071 e1005436. doi:10.1371/journal.pgen.1005436
- 1072 76. Do R, Balick D, Li H, Adzhubei I, Sunyaev S, Reich D. No evidence that selection  
1073 has been less effective at removing deleterious mutations in Europeans than in  
1074 Africans. *Nat Genet.* 2015;47: 126–131. doi:10.1038/ng.3186
- 1075 77. Simons YB, Turchin MC, Pritchard JK, Sella G. The deleterious mutation load is  
1076 insensitive to recent population history. *Nat Genet.* 2014;46: 220–224.  
1077 doi:10.1038/ng.2896
- 1078 78. Gravel S. When is selection effective? *Genetics.* 2016;203: 451–462.  
1079 doi:10.1534/genetics.115.184630
- 1080 79. Braverman JM, Hudson RR, Kaplan NL, Langley CH, Stephan W. The hitchhiking  
1081 effect on the site frequency spectrum of DNA polymorphisms. *Genetics.*  
1082 1995;140: 783–796.
- 1083 80. Stephan W. Genetic hitchhiking versus background selection: the controversy and  
1084 its implications. *Philos Trans R Soc B.* 2010;365: 1245–1253.

- 1085 doi:10.1098/rstb.2009.0278  
1086 81. Coventry A, Bull-Otterson LM, Liu X, Clark AG, Maxwell TJ, Crosby J, et al. Deep  
1087 resequencing reveals excess rare recent variants consistent with explosive  
1088 population growth. *Nat Commun.* 2010;1: 131. doi:10.1038/ncomms1130  
1089 82. Keinan A, Clark AG. Recent explosive human population growth has resulted in  
1090 an excess of rare genetic variants. *Science.* 2012;336: 740–743.  
1091 doi:10.1126/science.1217283  
1092 83. Nelson MR, Wegmann D, Ehm MG, Kessner D, St. Jean P, Verzilli C, et al. An  
1093 abundance of rare functional variants in 202 drug target genes sequenced in  
1094 14,002 people. *Science.* 2012;337: 100–104. doi:10.1126/science.1217876  
1095 84. Gazave E, Ma L, Chang D, Coventry A, Gao F, Muzny D, et al. Neutral genomic  
1096 regions refine models of recent rapid human population growth. *Proc Natl Acad*  
1097 *Sci.* 2014;111: 757–762. doi:10.1073/pnas.1310398110  
1098 85. Fay JC, Wu CI. A human population bottleneck can account for the discordance  
1099 between patterns of mitochondrial versus nuclear DNA variation. *Mol Biol Evol.*  
1100 1999;16: 1003–1005. doi:10.1093/oxfordjournals.molbev.a026175  
1101 86. Pool JE, Nielsen R. Population size changes reshape genomic patterns of  
1102 diversity. *Evolution (N Y).* 2007;61: 3001–3006. doi:10.1111/j.1558-  
1103 5646.2007.00238.x  
1104 87. Gottipati S, Arbiza L, Siepel A, Clark AG, Keinan A. Analyses of X-linked and  
1105 autosomal genetic variation in population-scale whole genome sequencing. *Nat*  
1106 *Genet.* 2011;43: 741–743. doi:10.1038/ng.877  
1107 88. Arbiza L, Gottipati S, Siepel A, Keinan A. Contrasting X-linked and autosomal  
1108 diversity across 14 human populations. *Am J Hum Genet.* 2014;94: 827–844.  
1109 doi:10.1016/j.ajhg.2014.04.011  
1110 89. Wilson Sayres MA, Lohmueller KE, Nielsen R. Natural selection reduced diversity  
1111 on human Y chromosomes. *PLoS Genet.* 2014;10: e1004064.  
1112 doi:10.1371/journal.pgen.1004064  
1113 90. Hammer MF, Woerner AE, Mendez FL, Watkins JC, Cox MP, Wall JD. The ratio  
1114 of human X chromosome to autosome diversity is positively correlated with  
1115 genetic distance from genes. *Nat Genet.* 2010;42: 830–831. doi:10.1038/ng.651  
1116 91. Leffler EM, Bullaughey K, Matute DR, Meyer WK, Ségurel L, Venkat A, et al.  
1117 Revisiting an old riddle: What determines genetic diversity levels within species?  
1118 *PLoS Biol.* 2012;10: e1001388. doi:10.1371/journal.pbio.1001388  
1119 92. Vucetich JA, Waite TA, Nunney L. Fluctuating population size and the ratio of  
1120 effective to census population size. *Evolution (N Y).* 1997;51: 2017–2021.  
1121 doi:10.2307/2411022  
1122 93. Coop G. Does linked selection explain the narrow range of genetic diversity  
1123 across species? *bioRxiv.* 2016; doi:10.1101/042598  
1124 94. Lewontin RC. *The genetic basis of evolutionary change.* New York and London:  
1125 Columbia University Press; 1974.  
1126 95. Uricchio LH, Torres R, Witte JS, Hernandez RD. Population genetic simulations of  
1127 complex phenotypes with implications for rare variant association tests. *Genet*  
1128 *Epidemiol.* 2015;39: 35–44. doi:10.1002/gepi.21866  
1129 96. Maher MC, Uricchio LH, Torgerson DG, Hernandez RD. Population genetics of  
1130 rare variants and complex diseases. *Hum Hered.* 2012;74: 118–128.



- 1131 doi:10.1159/000346826  
1132 97. Uricchio LH, Zaitlen NA, Ye CJ, Witte JS, Hernandez RD. Selection and explosive  
1133 growth alter genetic architecture and hamper the detection of causal rare variants.  
1134 *Genome Res.* 2016;26: 863–873. doi:10.1101/gr.202440.115  
1135 98. Danecek P, Auton A, Abecasis G, Albers CA, Banks E, DePristo MA, et al. The  
1136 variant call format and VCFtools. *Bioinformatics.* 2011;27: 2156–2158.  
1137 doi:10.1093/bioinformatics/btr330  
1138 99. Henn BM, Botigué LR, Peischl S, Dupanloup I, Lipatov M, Maples BK, et al.  
1139 Distance from sub-Saharan Africa predicts mutational load in diverse human  
1140 genomes. *Proc Natl Acad Sci.* 2016;113: E440-449.  
1141 doi:10.1073/pnas.1510805112  
1142 100. Kidd JM, Sharpton TJ, Bobo D, Norman PJ, Martin AR, Carpenter ML, et al.  
1143 Exome capture from saliva produces high quality genomic and metagenomic  
1144 data. *BMC Genomics.* 2014;15: 262. doi:10.1186/1471-2164-15-262  
1145 101. Kim HL, Ratan A, Perry GH, Montenegro A, Miller W, Schuster SC. Khoisan  
1146 hunter-gatherers have been the largest population throughout most of modern-  
1147 human demographic history. *Nat Commun.* 2014;5: 5692.  
1148 doi:10.1038/ncomms6692  
1149 102. Pollard KS, Hubisz MJ, Rosenbloom KR, Siepel A. Detection of nonneutral  
1150 substitution rates on mammalian phylogenies. *Genome Res.* 2010;20: 110–121.  
1151 doi:10.1101/gr.097857.109  
1152 103. Siepel A, Bejerano G, Pedersen JS, Hinrichs AS, Hou M, Rosenbloom K, et al.  
1153 Evolutionarily conserved elements in vertebrate, insect, worm, and yeast  
1154 genomes. *Genome Res.* 2005;15: 1034–1050. doi:10.1101/gr.3715005  
1155 104. Bernstein BE, Birney E, Dunham I, Green ED, Gunter C, Snyder M, et al. An  
1156 integrated encyclopedia of DNA elements in the human genome. *Nature.*  
1157 2012;489: 57–74. doi:10.1038/nature11247  
1158 105. Bailey JA, Yavor AM, Massa HF, Trask BJ, Eichler EE. Segmental duplications:  
1159 Organization and impact within the current human genome project assembly.  
1160 *Genome Res.* 2001;11: 1005–1017. doi:10.1101/gr.187101  
1161 106. Szpiech ZA, Hernandez RD. selscan: An efficient multithreaded program to  
1162 perform EHH-based scans for positive selection. *Mol Biol Evol.* 2014;31: 2824–  
1163 2827. doi:10.1093/molbev/msu211  
1164 107. Capra JA, Hubisz MJ, Kostka D, Pollard KS, Siepel A. A model-based analysis of  
1165 GC-biased gene conversion in the human and chimpanzee genomes. *PLoS*  
1166 *Genet.* 2013;9: e1003684. doi:10.1371/journal.pgen.1003684  
1167 108. Frazer KA, Ballinger DG, Cox DR, Hinds DA, Stuve LL, Gibbs RA, et al. A second  
1168 generation human haplotype map of over 3.1 million SNPs. *Nature.* 2007;449:  
1169 851–861. doi:10.1038/nature06258  
1170 109. Pratto F, Brick K, Khil P, Smagulova F, Petukhova G V, Camerini-Otero RD.  
1171 Recombination initiation maps of individual human genomes. *Science.* 2014;346:  
1172 1256442. doi:10.1126/science.1256442  
1173 110. Wang K, Li M, Hakonarson H. ANNOVAR: Functional annotation of genetic  
1174 variants from high-throughput sequencing data. *Nucleic Acids Res.* 2010;38:  
1175 e164. doi:10.1093/nar/gkq603  
1176 111. Hernandez RD, Williamson SH, Zhu L, Bustamante CD. Context-dependent

- 1177 mutation rates may cause spurious signatures of a fixation bias favoring higher  
1178 GC-content in humans. *Mol Biol Evol.* 2007;24: 2196–2202.  
1179 doi:10.1093/molbev/msm149
- 1180 112. Palamara PF, Francioli LC, Wilton PR, Genovese G, Gusev A, Finucane HK, et  
1181 al. Leveraging distant relatedness to quantify human mutation and gene-  
1182 conversion rates. *Am J Hum Genet.* 2015;97: 775–789.  
1183 doi:10.1016/j.ajhg.2015.10.006
- 1184 113. Hernandez RD. A flexible forward simulator for populations subject to selection  
1185 and demography. *Bioinformatics.* 2008;24: 2786–2787.  
1186 doi:10.1093/bioinformatics/btn522
- 1187 114. Torgerson DG, Boyko AR, Hernandez RD, Indap A, Hu X, White TJ, et al.  
1188 Evolutionary processes acting on candidate cis-regulatory regions in humans  
1189 inferred from patterns of polymorphism and divergence. *PLoS Genet.* 2009;5:  
1190 e1000592. doi:10.1371/journal.pgen.1000592
- 1191 115. Hudson RR, Slatkin M, Maddison WP. Estimation of levels of gene flow from DNA  
1192 sequence data. *Genetics.* 1992;132: 583–589.  
1193  
1194

## 1195 **Supporting information**

### 1196 **S1 Appendix. Soft sweep detection and implementation in selscan v1.2.0.**

#### 1197 **S1 Supporting information.**

1198 **S1 Fig. Inference models inferred from TGP CG high *B* neutral regions and coding**  
1199 **four-fold degenerate sites.** Solid lines are the inference results from running dadi on  
1200 53 YRI (African), 64 CEU (European), and 62 CHS (East Asian) TGP CG samples (pro-  
1201 jected down to 106 chromosomes during inference procedure) across neutral regions in  
1202 the highest 1% *B* bin ( $B \geq 0.994$ ). Broken lines represent the inference results using the  
1203 same CG samples, but with sequence data only from coding four-fold degenerate syn-  
1204 onymous sites.

1205 **S2 Fig. Diversity for TGP non-admixed populations while controlling for GC-**  
1206 **biased gene conversion and recombination hotspots.** (A) Normalized diversity  
1207 ( $\pi/\text{divergence}$ ) measured across the lowest 1% *B* quantile bin (strong BGS). (B) Nor-  
1208 malized diversity measured across the highest 1% *B* quantile bin (weak BGS). (C) Rela-

1209 tive diversity: the ratio of normalized diversity for the lowest 1%  $B$  bin to normalized di-  
1210 versity for the highest 1%  $B$  bin ( $\pi/\pi_0$ ). Error bars represent  $\pm 1$  SEM calculated from  
1211 1,000 bootstrapped datasets.

1212 **S3 Fig. Diversity for TGP non-admixed populations without normalizing by diver-**  
1213 **gence with Rhesus macaque.** (A) Diversity ( $\pi$ ) measured across the lowest 1%  $B$   
1214 quantile bin (strong BGS). (B) Diversity measured across the highest 1%  $B$  quantile bin  
1215 (weak BGS). (C) Relative diversity: the ratio of diversity for the lowest 1%  $B$  bin to diver-  
1216 sity for the highest 1%  $B$  bin ( $\pi/\pi_0$ ). Error bars represent  $\pm 1$  SEM calculated from 1,000  
1217 bootstrapped datasets.

1218 **S4 Fig. Diversity for TGP continental groups while controlling for GC-biased gene**  
1219 **conversion and recombination hotspots.** (A) Normalized diversity ( $\pi/\text{divergence}$ )  
1220 measured across the lowest 1%, 5%, 10% and 25%  $B$  quantile bins (strong BGS) and  
1221 the highest 1%  $B$  quantile bin (weak BGS). (B) Relative diversity ( $\pi/\pi_0$ ) for the lowest  
1222 1%, 5%, 10%, and 25%  $B$  bins. Error bars represent  $\pm 1$  SEM calculated from 1,000  
1223 bootstrapped datasets.

1224 **S5 Fig. Diversity for TGP continental groups without normalizing by divergence**  
1225 **with Rhesus macaque.** (A) Diversity ( $\pi$ ) measured across the lowest 1%, 5%, 10% and  
1226 25%  $B$  quantile bins (strong BGS) and the highest 1%  $B$  quantile bin (weak BGS). (B)  
1227 Relative diversity ( $\pi/\pi_0$ ) for the lowest 1%, 5%, 10%, and 25%  $B$  bins. Error bars repre-  
1228 sent  $\pm 1$  SEM calculated from 1,000 bootstrapped datasets.

1229 **S6 Fig.  $F_{ST}$  measured across joint bins of  $B$  and recombination rate for different**  
1230 **TGP continental groups.** The left panels of S6 Figs A-E show  $F_{ST}$  measured as a func-  
1231 tion of 25 4% recombination rate quantile bins conditional on three 2%  $B$  quantile bins

1232 (note log scale of x-axis for recombination rate). The right panels of S6 Figs A-E show  
1233  $F_{ST}$  measured as a function of 25 4%  $B$  quantile bins conditional on three 2% recombi-  
1234 nation rate quantile bins. The following continental group comparisons are shown for  
1235 each plot: (A) African vs. European, (B) African vs. East Asian, (C) European vs. South  
1236 Asian, (D) European vs. East Asian, (E) South Asian vs. East Asian. Smaller transpar-  
1237 ent points and lines show the  $F_{ST}$  estimates and corresponding lines of best fit (using  
1238 linear regression) for each of the pairwise population comparisons within a particular  
1239 pair of continental groups (25 comparisons total). Larger opaque points are mean  $F_{ST}$   
1240 estimates across all pairwise comparisons within a particular pair of continental groups  
1241 (with bold lines showing their corresponding lines of best fit).

1242 **S7 Fig. Simulations of diversity and relative diversity under BGS using a human**  
1243 **demographic model without migration.** (A) Inferred demographic model from Com-  
1244 plete Genomics TGP data. The demographic model used for the simulations in S7 Fig  
1245 are identical to those used for Fig 5, except that migration parameters between all popu-  
1246 lations are set to 0. (B) Simulated diversity at neutral sites across populations as a func-  
1247 tion of time under our inferred demographic model without BGS ( $\pi_0$  - dashed colored  
1248 lines) and with BGS ( $\pi$  - solid colored lines). (C) Relative diversity ( $\pi/\pi_0$ ) measured by  
1249 taking the ratio of diversity with BGS ( $\pi$ ) to diversity without BGS ( $\pi_0$ ) at each time point.  
1250 Note that the x-axes in all three figures are on the same scale. Time is scaled using a  
1251 human generation time of 25 years per generation. Simulation data was sampled every  
1252 100 generations.

1253 **S8 Fig. Simulations of diversity and relative diversity under BGS using various**  
1254 **fractions of sites experiencing deleterious mutation.** Values for the deleterious site



1255 fraction are provided in the header for each set of plots. Left column plots show results  
1256 of simulations under a demographic model with migration between all human popula-  
1257 tions. Right column plots show results of simulations under a demographic model with  
1258 no migration. Colored lines represent different populations though time and are identical  
1259 to those in Fig 5 and S7 Fig The demographic model used is also identical to that in Fig  
1260 5 (for simulations with migration) and S7 Fig (for simulations without migration). Simula-  
1261 tion data was sampled every 100 generations.

1262 **S9 Fig.  $F_{ST}$  is not correlated with recombination rate.**

1263  $F_{ST}$  measured across 2% recombination rate quantile bins. The right panel of S9 Fig  
1264 displays a narrower range of recombination rates to show detail. Smaller transparent  
1265 points and lines show the estimates and corresponding lines of best fit (using linear re-  
1266 gression) for  $F_{ST}$  between every pairwise population comparison for a particular pair of  
1267 continental groups (25 pairwise comparisons each). Larger opaque points and lines are  
1268 mean  $F_{ST}$  estimates and lines of best fit across all Thousand Genomes Project (TGP)  
1269 population comparisons between a particular pair of continental groups. Error bars rep-  
1270 resent  $\pm 1$  SEM calculated from 1,000 bootstrapped datasets.

1271 **S10 Fig.  $F_{ST}$  between African (AFR) and South Asian (SASN) populations jointly**  
1272 **across  $B$  and recombination rate.**

1273 (A)  $F_{ST}$  as a function of 25 recombination rate bins (4% quantile bins) conditional on  
1274 three different 2%  $B$  quantile bins (note log scale of x-axis for recombination rate). (B)  
1275  $F_{ST}$  as a function of 25  $B$  bins (4% quantile bins) conditional on three different 2% re-  
1276 combination rate quantile bins. Smaller transparent points and lines show the  $F_{ST}$  esti-  
1277 mates and corresponding lines of best fit (using linear regression) for each of the pair-

1278 wise comparisons of AFR vs. SASN Thousand Genomes Project (TGP) populations (25  
1279 comparisons total). Larger opaque points are mean  $F_{ST}$  estimates across all pairwise  
1280 comparisons of AFR vs. SASN TGP populations (with bold lines showing their corre-  
1281 sponding lines of best fit).

1282 **S11 Fig. Comparing patterns of diversity between local ancestry segments of ad-  
1283 mixed samples and continental groups.**

1284 (A) Normalized diversity (heterozygosity/divergence) and (B) Relative diversity: the ratio  
1285 of normalized diversity in the lowest  $B$  quantile bins (strong BGS) in (A) to normalized  
1286 diversity in the highest 1%  $B$  quantile bin (weak BGS). Local ancestry segments include  
1287 African, European, and Native American ancestries. Continental groups include African,  
1288 European, and East Asian populations. Error bars represent  $\pm 1$  SEM calculated from  
1289 1,000 bootstrapped datasets.

1290 **S12 Fig. Simulations of singleton density and relative singleton density**

1291 A) Results of simulations under a demographic model with migration between all human  
1292 populations. B) Results of simulations under a demographic model with no migration.  
1293 The second row of A) and B) shows measurements of singleton density (i.e., number of  
1294 singletons observed per site) from simulations without BGS ( $\psi_0$  - dashed colored lines)  
1295 and with BGS ( $\psi$  - solid colored lines). The bottom row of A) and B) shows correspond-  
1296 ing relative singleton density ( $\psi/\psi_0$ ) measured by taking the ratio of singleton density  
1297 with BGS ( $\psi$ ) to singleton density without BGS ( $\psi_0$ ) at each sampled generation time  
1298 point. The simulation data used for these measurements is identical to that of Fig 5 (for  
1299 simulations with migration) and S7 Fig (for simulations without migration).

1300

1301

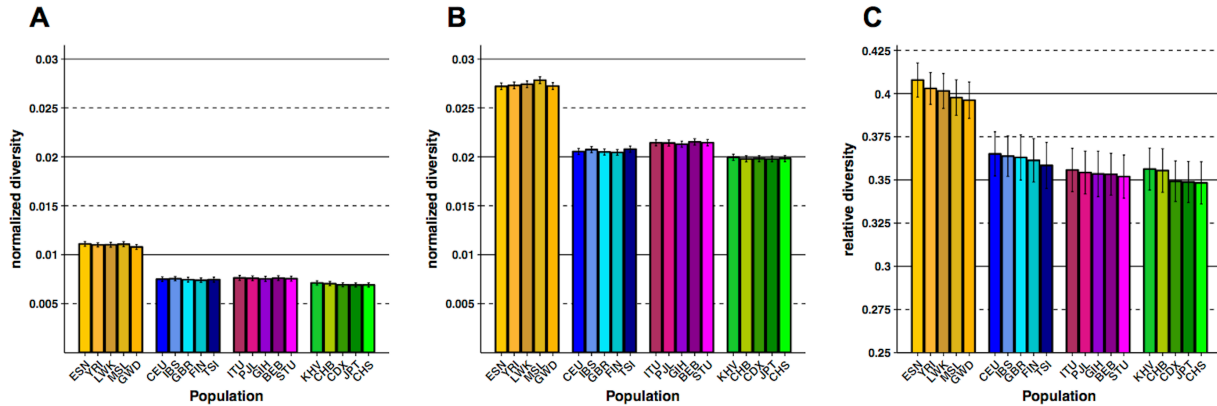

1302

1303 **Fig 1. Normalized diversity and relative diversity for non-admixed populations of**  
1304 **the Thousand Genomes Project (TGP).**

1305 (A) Normalized diversity ( $\pi$ /divergence) measured across the lowest 1%  $B$  quantile bin  
1306 (strong BGS). (B) Normalized diversity measured across the highest 1%  $B$  quantile bin  
1307 (weak BGS). (C) Relative diversity: the ratio of normalized diversity in the lowest 1%  $B$   
1308 bin to normalized diversity in the highest 1%  $B$  bin ( $\pi/\pi_0$ ). TGP population labels are in-  
1309 dicated below each bar (see S12 Table in Supporting information for population label  
1310 descriptions), with African populations colored by gold shades, European populations  
1311 colored by blue shades, South Asian populations colored by violet shades, and East  
1312 Asian populations colored by green shades. Error bars represent  $\pm 1$  SEM calculated  
1313 from 1,000 bootstrapped datasets.

1314

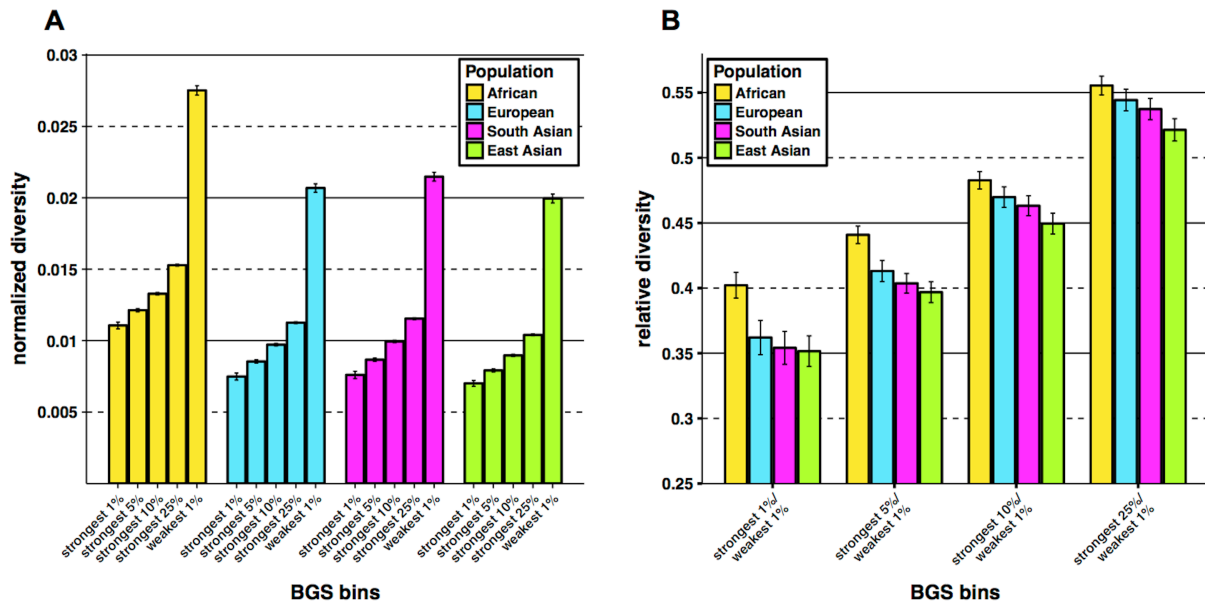

1315

1316 **Fig 2. Normalized and relative diversity for Thousand Genomes Project (TGP)**  
 1317 **continental groups.**

1318 (A) Normalized diversity ( $\pi$ /divergence) measured across the lowest 1%, 5%, 10% and  
 1319 25% *B* quantile bins (strong BGS) and the highest 1% *B* quantile bin (weak BGS). (B)  
 1320 Relative diversity: the ratio of normalized diversity in the lowest *B* quantile bins (strong  
 1321 BGS) in (A) to normalized diversity in the highest 1% *B* quantile bin (weak BGS). Error  
 1322 bars represent  $\pm 1$  SEM calculated from 1,000 bootstrapped datasets.

1323

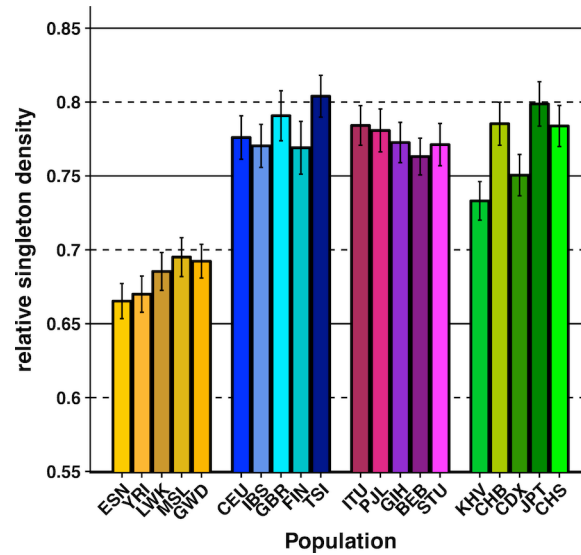

1324

1325 **Fig 3. Relative singleton density for non-admixed populations of the Thousand**  
1326 **Genomes Project (TGP).**

1327 Relative singleton density measured by taking the ratio of singleton density in the lowest  
1328 1% *B* quantile bin to singleton density in the highest 1% *B* quantile bin ( $\psi/\psi_0$ ). Singleton  
1329 density was normalized by divergence with Rhesus macaque. TGP population labels  
1330 are indicated below each bar (see S12 Table in Supporting information for population  
1331 label descriptions), with African populations colored by gold shades, European popula-  
1332 tions colored by blue shades, South Asian populations colored by violet shades, and  
1333 East Asian populations colored by green shades. Error bars represent  $\pm 1$  SEM calculat-  
1334 ed from 1,000 bootstrapped datasets.

1335

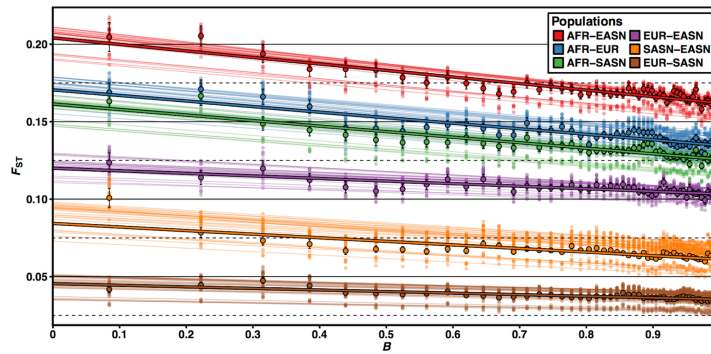

1336

1337 **Fig 4.  $F_{ST}$  is correlated with  $B$**

1338  $F_{ST}$  measured across 2% quantile bins of  $B$ . Smaller transparent points and lines show  
1339 the estimates and corresponding lines of best fit (using linear regression) for  $F_{ST}$  be-  
1340 tween every pairwise population comparison for a particular pair of continental groups  
1341 (25 pairwise comparisons each). Larger opaque points and lines are mean  $F_{ST}$  esti-  
1342 mates and lines of best fit across all Thousand Genomes Project (TGP) population  
1343 comparisons between a particular pair of continental groups. Error bars represent  $\pm 1$   
1344 SEM calculated from 1,000 bootstrapped datasets.

1345

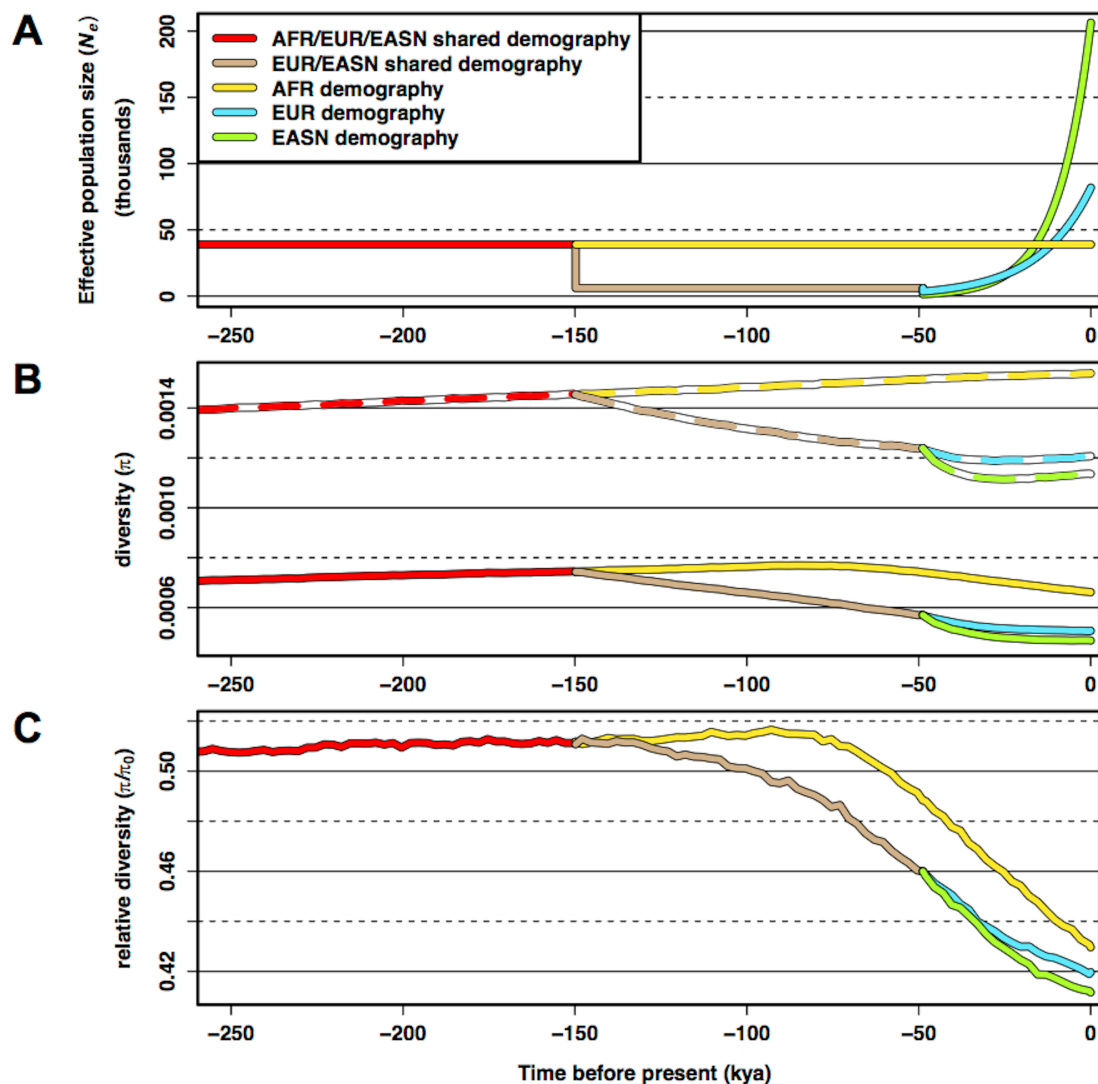

1346

1347 **Fig 5. Simulations confirm that demographic events shape the impact of back-**  
1348 **ground selection (BGS).**

1349 (A) Inferred demographic model from Complete Genomics Thousand Genomes Project  
1350 (TGP) data showing population size changes for Africans (AFR), Europeans (EUR), and  
1351 East Asians (EASN) as a function of time that was used for the simulations of BGS. (B)  
1352 Simulated diversity at neutral sites across populations as a function of time under our  
1353 inferred demographic model without BGS ( $\pi_0$  - dashed colored lines) and with BGS ( $\pi$  -



1354 solid colored lines). (C) Relative diversity ( $\pi/\pi_0$ ) measured by taking the ratio of diversity  
1355 with BGS ( $\pi$ ) to diversity without BGS ( $\pi_0$ ) at each time point. Note that the x-axes in all  
1356 three figures are on the same scale. Time is scaled using a human generation time of  
1357 25 years per generation. Simulation data was sampled every 100 generations.  
1358
